# Supplementary material for: Consumption of atmospheric methane by the Qinghai–Tibetan Plateau alpine steppe ecosystem
Source: Copernicus journal article supplement (doi:10.5194/tc-2017-264), 2017-12-08
Supplement: Supplementary file [file tc-2017-264-AC1-supplement.zip]

# Consumption of atmospheric methane by the Qinghai–Tibetan Plateau alpine steppe ecosystem

Hanbo Yun<sup>1,2,3</sup>, Qingbai Wu<sup>1\*</sup>, Qianlai Zhuang<sup>3\*</sup>, Anping Chen<sup>4\*</sup>, Tong Yu<sup>3</sup>, Zhou Lyu<sup>3</sup>, Yuzhong Yang<sup>1</sup>, Huijun Jin<sup>1</sup>, Guojun Liu<sup>1</sup>, Yang Qu<sup>3</sup>, Licheng Liu<sup>3</sup>

1. State Key Laboratory of Frozen Soil Engineering, Northwest Institute of Eco–Environment and Resources, Chinese Academy of Sciences, Lanzhou, Gansu 730000, China

2. Key Laboratory for Land Surface Process and Climate Change in Cold and Arid Regions, Chinese Academy of Sciences, Lanzhou, 730000, China

3. Department of Earth, Atmospheric, and Planetary Sciences, Purdue University, West Lafayette, Indiana 47907, USA

4. Department of Forestry and Natural Resources, Purdue University, West Lafayette, Indiana 47907, USA

\*Authors for correspondence: [gbwu@lzb.ac.cn](mailto:gbwu@lzb.ac.cn) [Q. W.], [gqzhuang@purdue.edu](mailto:gqzhuang@purdue.edu) [Q.Z.], [apchen1111@gmail.com](mailto:apchen1111@gmail.com) [A.C.]

A manuscript for *The Cryosphere*

May 30, 2018

## Abstract

The Methane (CH<sub>4</sub>) cycle on the Qinghai–Tibetan Plateau (QTP), the world’s largest high–elevation permafrost region, is sensitive to climate change and subsequent freezing and thawing dynamics. Yet, its magnitudes, patterns, and environmental controls are still poorly understood. Here, we report results from five continuous year–round CH<sub>4</sub> observations from a typical alpine steppe ecosystem in the QTP permafrost region. Our results suggest that the QTP permafrost region was a CH<sub>4</sub> sink of  $-0.86 \pm 0.23$  g CH<sub>4</sub>–C m<sup>-2</sup> yr<sup>-1</sup> over 2012 – 2016, a rate higher than that of many other permafrost areas, such as the Arctic tundra in northern Greenland, Alaska, and western Siberia. Soil temperature and soil water content were dominant factors controlling CH<sub>4</sub> fluxes, however, their correlations changed with soil depths, due to freezing and thawing dynamics. This region was a net CH<sub>4</sub> sink in autumn, but a net source in spring, despite both seasons experiencing similar top soil thawing and freezing dynamics. The opposite CH<sub>4</sub> source/sink function in spring versus in autumn was likely caused by the respective seasons specialized freezing and thawing processes, which modified the vertical distribution of soil layers that are highly mixed in autumn, but not in spring. Furthermore, the traditional definition of four seasons failed to capture the pattern of the annual CH<sub>4</sub> cycle. We developed a new seasonal division method based on soil temperature, bacterial activity, and permafrost active layer thickness, which significantly improved the modelling of the annual CH<sub>4</sub> cycle. Collectively, our findings highlight the critical role of fine–scale climate freezing and thawing dynamics in driving permafrost CH<sub>4</sub> dynamics, which needs to be better monitored and modelled in Earth system models.

## 1. Introduction

Since 2007, the global atmospheric methane concentration [ $\text{CH}_4$ ] continues to rise, after remaining stable between the 1990s and 2006 (Rigby et al., 2008; IPCC, 2013; Patra and Kort, 2016). Understanding mechanisms for this recent increase requires improved knowledge on methane ( $\text{CH}_4$ ) sources and sinks for regional and global  $\text{CH}_4$  budgets (Kirschke et al., 2013; Zona et al., 2016). However, estimates on global  $\text{CH}_4$  emissions and consumptions are still highly uncertain (Spahni et al., 2011; Kirschke, 2013). In particular, the bottom-up approach, which estimates  $\text{CH}_4$  budgets using ground observations and inventory, overestimated the global  $\text{CH}_4$  budget by 6~20 times, compared to the atmospherically constrained top-down approach (Zhu et al., 2004; Lau et al., 2015). This discrepancy is partly due to limited monitoring data and to our poor understanding of important factors regulating the production and consumption of  $\text{CH}_4$  ( Whalen and Reeburgh, 1990; Dengel et al., 2013; Bohn et al., 2015).

The Qinghai-Tibetan Plateau (QTP) is the world's largest high-elevation permafrost region of  $1.23 \times 10^6 \text{ km}^2$  (Wang et al., 2000). The QTP is currently experiencing a rapid change in climate, which affects freezing and thawing processes. The change in the freezing and thawing dynamic profoundly impacts methanotrophy and methanogenesis, which consequently impacts net  $\text{CH}_4$  fluxes (Mastepanov *et al.*, 2013; Lau et al., 2015). However, due to the scarcity of high temporal-resolution year-round environment and  $\text{CH}_4$  monitoring, we still know little about the size, seasonal pattern, and underlying controls of climate and permafrost freezing and thawing, and the resulting effects on  $\text{CH}_4$  exchanges in the QTP permafrost region (Cao et al., 2008; Wei et al., 2015a; Song et al., 2015; ). This knowledge gap also hampers our capacity to predict and understand QTP permafrost  $\text{CH}_4$  cycles under current and projected future climates.

Here, we report results from a 5-year continuous *in situ* monitoring of CH<sub>4</sub> dynamics with an eddy covariance (EC) technique at the Beilu'he Research Station, which is a representative site for QTP permafrost heartland. The site was covered by alpine steppe vegetation from January 1<sup>st</sup>, 2012 to December 31<sup>st</sup>, 2016. The primary aims of this investigation are to understand (1) the long-term annual and seasonal variation of the methane budget for a typical alpine permafrost site in the QTP, and (2) the environmental factors controlling these CH<sub>4</sub> variations and possible underlying mechanisms. In addition, while the consumption and production of ecosystem methane are known through microbial activities, conventional investigations on seasonal methane fluxes usually used climate or vegetation defined "seasons". Therefore, a third research goal of this current study is to investigate if the classical vegetation productivity-based definition of growing season will be useful for defining the methane flux seasonality.

There are three advantages of our data acquisition system. First, the EC system recorded the data of CH<sub>4</sub> fluxes, climate, and soil properties every half hour. As the QTP permafrost is characterized by a rapidly changing climate and a rapidly changing soil freezing and thawing dynamic, even over a time period as short as one day, different aerobic or anaerobic soil environments that favor different types of CH<sub>4</sub> bacteria may change (Rivkina et al., 2004; Lau et al., 2015). Thus, high-resolution *in situ* monitoring data enables us to quantify CH<sub>4</sub> exchange patterns from diel to annual time-scales and investigate their major environmental drivers. Second, our field investigation spanned five full calendar years, including both plant growing and non-growing seasons. Observations of the plant non-growing season, which accounts for two-thirds of a year, were very rare in current literature (Song et al., 2015). Third, the EC system we used overcame some technical problems caused by the often used static chambers, including

limited representation of local site heterogeneity and additional heating of the soil surface (Chang et al., 2014; Wei et al., 2015b).

## **2. Methods**

### **2.1 Site Description**

The research site, Beilu'he permafrost research station (34° 09' 006" N, 92° 02' 080" E), is located in the alpine steppe continuous permafrost area of the northern QTP, about 320 kilometers southwest of Golmud, Qinghai Province (Figure 1). At an elevation of 4765 meters, the air is thin with only 0.6 standard atmospheric pressure. According to *in situ* observations, the site receives solar radiation of about 6720 MJ meter<sup>-2</sup>. The non-growing season is long and cold, with 225 days per year having an annual air temperature of -18 °C on average from 2012 to 2016. The site's growing season is short and cool, with 140 days per year from 2012 to 2016, and a mean annual air temperature of 4.6 °C. According to the site drilling exploration, the permafrost depth can extend to 50 – 70 m belowground, and the thickness of the active layer (ALT) is about 2.2 – 4.8 m. The soil is composed of Quaternary fine sand or silt (Table 1), overlying on Triassic mudstone or weathered marl. Dominant plant species include: *Carex moorcroftii* Falc. ex Boott, *Kobresia tibetica* Maxim, *Androsace tanggulashanensis*, and *Rhodiola tibetica*. Vegetation coverage is approximately 33.5% and the average plant height is 15 cm.

### **2.2 Eddy Covariance observations**

We have continuously monitored CH<sub>4</sub>, carbon dioxide (CO<sub>2</sub>), water (H<sub>2</sub>O), and heat flux using a standard eddy covariance system tower 3 meters above the ground. CH<sub>4</sub> flux was measured with an open-path CH<sub>4</sub> analyzer system (Figure 1: d; LI-7700, LI-COR Inc., Lincoln, NE, USA).

The precision is 5 ppb, with RMS noise at 10 Hz and 2000 ppb. The instrument was placed on site on August 8<sup>th</sup>, 2011, and then connected to a three-dimensional sonic anemometer (heat and water flux; CSAT3, Campbell Scientific, and Logan, UT, USA; precision is 0.1 °C; accuracy is within 1% of reading for half-hour) and an open-path infrared gas analyzer (CO<sub>2</sub> flux; LI-7500A, LI-COR Inc., Lincoln, NE, USA; the precision is 0.01 μmol m<sup>-2</sup> s<sup>-1</sup> and the accuracy is within 1% of reading for half-hour, zero drift per °C is ± 0.1 ppm typical) on January 1<sup>st</sup>, 2012, when the system worked steadily. Monitoring data was recorded and stored at 10 Hz using a data logger (LI-7550, LI-COR Inc., Lincoln, NE, USA).

The operation, calibrations, and maintenance of the EC system followed standard procedures. To reduce the LI-7500A surface heating/cooling influence on CO<sub>2</sub> and H<sub>2</sub>O molar densities in tough environments, each year “summer style” was used in Li-7500A, in which surface temperature setting is 5 °C during May 1<sup>st</sup> to September 30<sup>th</sup>. “Winter style” was used from October 1<sup>st</sup> to the next year April 30<sup>th</sup> in Li-7500A, in which surface temperature setting is -5 °C. Calibrations of CO<sub>2</sub>, water vapor, and dew point generator measurements for LI-7500A analyzers were performed regularly by the China Land-Atmosphere Coordinated Observation System (CLAROS). Up-and-down mirrors of LI-COR 7700 were cleaned regularly every 30 days to make sure the signal strength was stronger than 80. All of these instruments were powered by solar-panel and battery.

### **2.3 Micrometeorological and Soil Measurements**

A wide range of meteorological variables were measured by a standard automatic meteorological tower 3 meters above the ground and 5 meters north of the eddy covariance tower. Net radiation (R<sub>n</sub>) and albedo were measured with a four-component radiometer (R<sub>n</sub>; CNR-1, Kipp and Zonen, the Netherlands). Air temperature (T<sub>air</sub>), air relative humidity, and

atmospheric pressure were measured with a temperature and humidity sensor (HMP45C, Vaisala Inc., Helsinki, Finland) in the meteorological tower. A rain gauge (TE525MM, Texas Electronics Inc., Dallas, TX, USA) was used to measure the precipitation process. Wind speed and wind direction were observed using a propeller anemometer placed on the top of the meteorological tower.

We also measured soil heat fluxes, soil temperature and soil relative water content (SWC). In August 2010, we installed soil environmental sensors 10 meters from the eddy covariance tower for soil sample collection. Two self-calibrating soil heat flux (SHF) sensors (HFP01) were placed 5 cm and 15 cm below the ground. A group pF-Meter sensor (GEO-Precision, Germany) was embedded in the soil under the meteorological tower to measure soil temperature ( $T_{\text{soil}}$ ) at 0 cm, 5 cm, 10 cm, 15 cm, 20 cm, 30 cm, 40 cm, 50 cm, 70 cm, 80 cm, 100 cm, 150 cm, 160 cm, and 200 cm depth. The pF meter sensors also measured SWC at 10 cm, 20 cm, 40 cm, 80 cm, and 160cm depth.

All of above environmental parameters were synchronously monitored with eddy covariance, and the data was recorded every 30 minutes by CR3000 (Data logger, Campbell Data Taker Ltd, Salt Lake City, UT, USA). The air temperature sensors, the humidity sensors, and the pF meter sensors were calibrated in the State Key Laboratory of Frozen Soil Engineering at the Chinese Academy of Sciences in order to ensure the measurement accuracy was within  $\pm 0.05^{\circ}\text{C}$  and  $\pm 5\%$ , respectively.

We also sampled soil profiles for soil physical and chemical measurements with one 1 meter  $\times$  1 meter  $\times$  2 meter pit 10 meter from the eddy covariance tower in August 2010. Five profile samples were taken from the pit at depths 0 – 20 cm, 20 – 50 cm, 50 – 120 cm, 120 –

160 cm, and 160 – 200 cm. Every depth was repeated five times after being fully mixed. Then each depth was stored in soil sample aluminum boxes and carefully sealed to prevent gas exchanges with air. The clod method was used to investigate the field wet bulk density (weight of soil per unit volume; Cate and nelson, 1971). The soil moisture content was calculated gravimetrically by the ratio of the mass of water present to the oven-dry (60 °C for 24 hour) weight of the soil sample. The soil organic carbon (SOC) content of the air-dried soil samples was analyzed using the wet combustion method, Walkley–Black modified acid dichromate digestion, FeSO<sub>4</sub> titration, and an automatic titrator. Total nitrogen (TN) and pH were measured using standard soil test procedures from the Chinese Ecosystem Research Network.

To understand the potential effect of soil thawing and freezing dynamics on CH<sub>4</sub> fluxes, we also reconstructed and verified semi-monthly data of soil active layer thickness (ALT). Following Muller’s original definition, ALT is the maximum thaw depth in the late autumn using a linear interpolation of T<sub>soil</sub> profiles between two neighboring points above and below the 0 °C isotherm (Muller, 1947). We used records of the soil thawing thickness measured with a self-made geological probe to verify the ALT data semi-monthly. More information about the measurement procedure was previously described by Wu and Zhang (2010a).

## 2.4 Microbial Activity

To understand how soil microbial activity may have impacted the CH<sub>4</sub> fluxes, we sampled 100-gram soils for soil microbial activity measurements. These soils were obtained using a soil sample drill device (Ø=0.03 m), with depths of 0 – 25 cm taken every 5 days within 100 m of the eddy covariance tower. The sampled soil was fully mixed and divided into two equal parts. Each part was then stored in sterilized aluminum boxes and then placed in liquid nitrogen, before sending to the lab for microbe RNA extraction. We then used a real-time PCR method to



genetically test methanotrophic / archaeal methanogens, and the procedure was repeated three times for each sample. By setting the maximum methanotrophic / archaeal methanogens gene expression cyclic number as 1, we calculated the variety coefficient of methanotrophic and archaeal methanogens gene expressions ( $\Delta I$  and  $\Delta II$ , respectively; %) with equation (1):

$$\Delta_i = \frac{x_i}{X_{Max}} \quad \dots \quad (1)$$

$\Delta_i$  is for the  $i^{\text{th}}$  methanotrophic/archaeal methanogens gene expression;  $x_i$  is the methanotrophic / archaeal methanogen gene expression cyclic number of the  $i^{\text{th}}$  time;  $x_{Max}$  is the maximum methanotrophic / archaeal methanogen gene expression cyclic number of the soil group from 2012 to 2016.

## 2.5 EC Data Processing and Data Filtering

Data collected from January 1<sup>st</sup>, 2012 to December 31<sup>st</sup>, 2016 was used in this study. Before processing, we removed data that was recorded at the time of precipitation events or with LI-7700 signal strength under 85. We first processed the raw data in Eddypro 6.2.0 (LI-COR, Lincoln, NE, USA). We adopted standardized procedures recommended in Lee et al. (2006) to process half-hourly flux raw measurements to ensure their quality.

1) Data was processed through statistical analysis in Eddypro 6.2.0 including: spike removal (accepted spikes < 5% and replaced spikes with linear interpolation), amplitude resolution (range of variation:  $7.0 \sigma$ , number of bins: 100, accepted empty bins: 70%), drop-outs (percentile defining extreme bins: 10, accepted central drop-outs: 10%, accepted extreme drop-outs: 6%), absolute limits ( $-30 \text{ m s}^{-1} < U < 30 \text{ m s}^{-1}$ ,  $-5 \text{ m s}^{-1} < W < 5 \text{ m s}^{-1}$ ,  $-40 \text{ }^{\circ}\text{C} < T_s < 40 \text{ }^{\circ}\text{C}$ ,  $200 \text{ } \mu\text{mol}$

mol<sup>-1</sup> < CO<sub>2</sub> < 500 μmol mol<sup>-1</sup>, 0 μmol mol<sup>-1</sup> < H<sub>2</sub>O < 40 μmol mol<sup>-1</sup>, 0.17 μmol < CH<sub>4</sub> < 1000 μmol), Skewness and kurtosis (-2.0 < Skewness lower limit < -1.0, 1.0 < Skewness up limit < 2.0; 1.0 < Kurtosis lower limit < 2.0, 5.0 < Kurtosis upper limit < 8.0), discontinuities (hard-flag threshold: U = 4.0, W = 2.0, T<sub>S</sub> = 4.0, CO<sub>2</sub> = 40, CH<sub>4</sub> = 40, and H<sub>2</sub>O = 3.26; soft-flag threshold: U = 2.7, W = 1.3, T<sub>S</sub> = 2.7, CO<sub>2</sub> = 27, CH<sub>4</sub> = 30, and H<sub>2</sub>O = 2.2), angle of attack (minimum angle of attack = -30, maximum angle attack = 30, accepted amount of outliers = 10%), and steadiness of horizontal wind (accepted wind relative instationarity = 0.5) (Vickers and Mahrt, 1997; Mauder et al., 2013).

2) The data was then corrected using atmosphere physical calculations expressed by: axis rotations of tilt correction (double rotation), time lags compensation (covariance maximization), and compensating density fluctuations of Webb–Pearman–Leuning (WPL) terms. When CO<sub>2</sub> and H<sub>2</sub>O molar densities are measured with the LI-COR 7500 / LI-COR 7500A in cold environments (low temperatures below -10 °C), a correction should be applied to account for the additional instrument-related sensible heat flux, due to instrument surface heating / cooling. Thus, we implemented the correction according to Burba et al. (2008), which involves calculating a corrected sensible heat flux ( $H'$ ) by adding estimated sensible heat fluxes from key instrument surface elements, including the bottom window ( $H_{bot}$ ), top window ( $H_{top}$ ), and spar ( $H_{spar}$ )—to the ambient sensible heat flux ( $H$ ):

$$H' = H + H_{bot} + H_{top} + 0.15 \times H_{spar} \quad \dots \quad (2)$$

3) Quality assurance (QA) / quality control (QC) were ensured through spectral analysis and corrections analysis in Eddypro 6.2.0. Spectra and co-spectra calculations used power-of-two samples to speed up the Fast Fourier Transform (FFT) algorithm. Spectra and co-spectra QA / QC

by filter were made according to Vickers and Mahrt (1997) test results, and Mauder and Foken (2004) micrometeorological quality test results. Low-frequency range spectral correction was done considering high-pass filtering effects. High-frequency range spectral correction was done considering low-pass filtering effects (Moncrieff et al., 2004).

4) We chose values “0”, “1”, “2” to flag the processed flux data into three quality classes in Eddypro 6.2.0. The combined flag attains the value “0” for best quality fluxes, “1” for fluxes suitable for general analysis, such as annual budgets, and “2” for fluxes that should be discarded from the results dataset. For our dataset, approximately 67% of the data fell into Class 0, 12% in Class 1, and 21% in Class 2.

5) Our analysis indicated that, under average meteorological conditions, 80% of the flux (footprint) came from an area within 175 m of the eddy covariance tower.

In addition, we also adopted the method in Burba et al. (2008) to adjust the half-hour flux data, to avoid apparent measuring errors. In doing this, we rejected half-hour flux data that fell into one of the following situations: (1) incomplete half-hour measurements, (2) measurements under rain impacts, (3) nighttime measurements under stable atmospheric conditions ( $U^*$ , friction velocity,  $< 0.1 \text{ m s}^{-1}$ ), and (4) abnormal values detected by a three-dimensional ultrasonic anemometer. This screening resulted in the rejection of about 20.7% of the flux data.

After the above data quality control, there was a 28.7% data gap for  $\text{CH}_4$  fluxes over the entire examination period. These data gaps were then filled according to the method described in literature (Falge et al., 2001; Papale et al., 2003). We used a linear interpolation to fill the gaps if they were less than 2 hours, a method described in Falge *et al.* (2001) to fill gaps greater than 2 hours, but less than 1 day, and an artificial neural network approach as described in Papale et al.

(2003) and Dengel et al. (2013) to fill gaps greater than 1 day.

The quality of the dataset was evaluated using the equation of energy closure:

$$EBR = \sum (H + \lambda E) / \sum (R_n - G - S) \quad \dots \quad 3$$

where the *EBR* is surface energy balance ratio; *H* is heat flux;  $\lambda E$  is latent heat; *R<sub>n</sub>* is net radiation; *G* is soil heat flux (SHF); and *S* is heat storage of the vegetation canopy. As vegetation coverage at this research site is sparse, *S* is ignored. From 2012 to 2016, the *EBR* average was larger than 67.5%.

We analyzed two different major sources of CH<sub>4</sub> flux gap-filling uncertainty. The first kind of uncertainty came from U\* threshold estimate. Following Burba et al. (2008), we excluded the probably false low CH<sub>4</sub> flux at low U\*. However, it was difficult to determine the value for the U\* threshold. For instance, when choosing a lower U\* threshold, the associated lower flux would contribute to the gap filling and the annual gross (Loescher, et al., 2006). The variance from 5% to 95% of the bootstrapped values provided an average of the uncertainties caused by the U\* to filter out. The second uncertainty source was due to insufficient power supply. In this research, all instrument power was supplied by solar. Extended periods of rainy, cloudy, and snowy weather, would cause the instrument to stop working due to an insufficient power supply. When we used the method to fill the gap mentioned above, it would cause the CH<sub>4</sub> to deviate from the true value. To our knowledge, the CH<sub>4</sub> flux data was largely uncertain under rainy conditions.

## 2.6 Based on microbial activities classification system of the four seasons

We redefined the four seasons of spring\_, summer\_, autumn\_, and winter\_, and based the parameters of the new seasons on microbial activities (Figure 2), ALT variety coefficients (ALT

264 variety coefficient =  $(ALT_{i+1} - ALT_i) / ALT_{Max}$ , where  $ALT_{Max}$  is the maximum of ALT per  
265 year), and Tsoil. Below, we describe the start date of each season (The end date of a season is the  
266 day immediately before the start of the next season).

267 Spring\_ starts at the first day of two consecutive observation periods fulfilling both (1)  $(\Delta II$   
268  $+ \Delta I) / 2 \geq 15\%$ , and (2) the ALT variety coefficient  $\geq 0.05$ .

269 Summer\_ starts on the first day of two consecutive observation periods when (1)  $(\Delta II + \Delta I)$   
270  $/ 2 \geq 45\%$ , (2) ALT variety coefficient  $\geq 0.35$ , and (3) five successive days with Tsoil at 40 cm  
271 soil depth  $\geq 0^\circ\text{C}$ .

272 Autumn\_ starts on the first day of two consecutive observation periods when (1)  $(\Delta II + \Delta I) /$   
273  $2 \geq 55\%$ , (2) the ALT variety coefficient  $\geq 0.60$ , and (3) five successive days the Tsoil of 10  
274 cm  $< 5^\circ\text{C}$ .

275 Winter\_ starts on the first day of two consecutive observation periods that (1)  $(\Delta II + \Delta I) / 2$   
276  $< 15\%$  and the ALT variety coefficient  $< 0.05$ .

277 To test the robustness of our new seasonal division method in our methane cycle analysis,  
278 we compared empirical  $\text{CH}_4$  flux estimates using different season definitions (Table 2). In  
279 addition to our new method that was based on top soil microbe activity, Tsoil of 0 – 40 cm, and  
280 permafrost active layer variability (hereafter refer to as SMT), we also used three conventional  
281 methods—one based on vegetation cover and temperature change (VCT), one on Julian months  
282 (JMC), and the other one on vegetation phenology change (VPC). Specifically, the VCT method  
283 splits a year into a plant growing season and a non-growing season; the JMC method assumes  
284 May to October as a plant growing season, and November to the following April as a non-

growing season; and the VPC method defines a plant growing season as the period between the time when all dominant grass species (*Carex Moorcroft Falc. ex Boott*, *Kobresia tibetica Maxim*, *Androsace tanggulashanensis*, *Rhodiola tibetica*) germinate and that when they all senesce.

## 2.7 Statistical Analyses

To understand the connections between CH<sub>4</sub> fluxes and associated environmental factors, we performed a series of statistical analyses, including correlation, principal component analyses (PCA), and linear regression analyses, in IBM SPSS (IBM SPSS Statistics 24; IBM, Armonk NY, USA). Specifically, we used bivariate correlation to examine pairwise relationships between environmental factors and CH<sub>4</sub> fluxes. We also used PCA and linear regressions to explore the sensitivity of CH<sub>4</sub> fluxes to simultaneous environmental fluctuations in wind speed, T<sub>air</sub>, air relative humidity, R<sub>n</sub>, vapor pressure deficit (VPD), albedo, SHF, SWC, and T<sub>soil</sub>. Before performing PCA and linear regressions, the entire dataset was examined for outliers (Cook's Distance,  $< 0.002$ ), homogeneity of variance (Levene test,  $p < 0.05$ ), normality (Kolmogorov–Smirnov test, smooth line for histogram of Studentized residuals), collinearity (variance inflation factor,  $0 < VIF < 10$ ), potential interactions ( $t$ -test,  $p < 0.05$ ), and independence of observations ( $t$ -test,  $p < 0.05$ ).

We performed structural equation modeling (SEM) to evaluate the effects of environmental variables on CH<sub>4</sub> fluxes for different seasons. SEM is a widely-used multivariate statistical tool that incorporates factor analysis, path analysis, and maximum likelihood analysis. This method uses *priori* knowledge of the relationships between focus variables to verify the validity of hypotheses. Here we performed SEM analyses with AMOS 21.0 (Amos Development Corporation, Chicago, IL, USA). All data are presented as mean values with standard deviations.

### 3. Results

#### 3.1 Meteorological Conditions

We first reported the statistics of environmental factors at the Beilu'he Permafrost Weather Station based on meteorological records from 2012 to 2016. Mean annual  $T_{air}$  was  $-4.5\text{ }^{\circ}\text{C}$  (Supplementary Figure 1), with minimum and maximum mean diel temperatures of  $-21.6\text{ }^{\circ}\text{C}$  (12<sup>th</sup> January, 2012) and  $13.8\text{ }^{\circ}\text{C}$  (28<sup>th</sup> July, 2015), respectively. Average net radiation was  $82.8\text{ Wm}^{-2}$ , while the maximum was in August ( $136.2\text{ Wm}^{-2}$ ; Supplementary Figure 2). The average VPD was about 0.3, while the maximum was 0.98, and the minimum was 0.02 (Supplementary Figure 3). Mean annual precipitation was 335.4 mm (Figure 3), which was primarily based on rain and snowfall (only occupied 7%). From 2012 to 2016, the maximum precipitation was 2013 (488.3 mm), and the minimum was in 2015 (310.0 mm). The majority of precipitation, approximately 92%, occurred in the summer. During the winter, precipitation was rare and the mean value was about 6.7 mm, with the value decreasing even further from 14.2 mm in 2012, to 2.1 mm in 2016. Spring was another important rainfall period besides summer, with mean precipitation being about 37.5 mm, or 8~17% of the total.

The Beilu'he site is windy during most of the year (Supplementary Figure 4). Its annual average speed was  $4.4\text{ m s}^{-1}$  from 2012 to 2016, while its maximum and minimum wind speeds were  $14.6\text{ m s}^{-1}$  on 14<sup>th</sup> February, 2016 and  $1.3\text{ m s}^{-1}$  on 1<sup>st</sup> November, 2013, respectively. Its winter, spring, and autumn average wind speed were  $5.4\text{ m s}^{-1}$ ,  $4.3\text{ m s}^{-1}$ , and  $3.7\text{ m s}^{-1}$ , respectively, while the principal direction of the strongest winds were from the southwest. Late autumn, winter, and early spring drought brought increased risks of dust blowing days, with an average of 122 days within a year. Its summer average wind speed was about  $3.30\text{ m s}^{-1}$ , predominantly driven by the

southwest wind.

The SWC and Tsoil varieties of soil layers from 2012 to 2016 at the field site were summarized in Supplementary Figure 5 and Supplementary Figure 6, respectively. Mean SWC of depths 10 cm, 20 cm, 40 cm, 80 cm, and 160 cm were 14%, 9%, 8%, 14%, and 19%, respectively. Tsoil of depths 0 cm, 5 cm, 10 cm, 20 cm, 30 cm, 40 cm, 50 cm, 70 cm, and 80 cm corresponded with the Tair changes, but at depths 100 cm, 150 cm, 160 cm, and 200 cm did not correspond. The Tsoil of depth 200 cm had a remarkable difference from the Tsoil of other layers. The reason could be that peat existed in this layer, and that, during winter, the peat layer was not completely frozen. Supplementary Figure 7 shows SHF half-hour and diel scale varieties of 5 cm and 15 cm depth. The annual mean value of SHF at 5 cm and 15 cm depth is  $7.6 \text{ Wm}^{-2}$  and  $6.8 \text{ Wm}^{-2}$ , respectively.

Finally, we also reported the site's average soil freezing and thawing dynamics observed from January 2012 to December 2016 in Supplementary Figure 8. The duration of the active layer in the thawing state at 40 cm depth ranged from 174 to 188 days, with an average variation of up to 14 days. The average ALT is 4.4 m from 2012 to 2016.

### **3.2 Annual, Seasonal and Diel Variabilities of Methane Fluxes**

Our results indicated that the Beilu'he site was a  $\text{CH}_4$  sink, with an annual mean strength of  $-0.86 \pm 0.23 \text{ g CH}_4\text{-C m}^{-2}$  (95% confidence interval; negative values mean  $\text{CH}_4$  sinks, positive values mean  $\text{CH}_4$  sources). The strength of the  $\text{CH}_4$  sink varies across different years from  $-0.57 \pm 0.27 \text{ g CH}_4\text{-C m}^{-2} \text{ yr}^{-1}$  in 2015, to  $-1.49 \pm 0.38 \text{ g CH}_4\text{-C m}^{-2} \text{ yr}^{-1}$  in 2014 (Figure 3). The amount of gene expression by methanogens and methanotrophs at 0 – 25 cm soils in March and November, for instance, were about 16.8% and 35.6%, respectively, suggesting strong microbial activities even during the cold and dry plant non-growing season (Figure 2).



We also clearly observed CH<sub>4</sub> seasonal variations (Supplementary Figure 9) in both the amount of CH<sub>4</sub> exchanges and their diel cycles (Figure 4). In winter\_, the net CH<sub>4</sub> flux at the Beilu'he site was an atmospheric source, with an average annual rate of  $0.41 \pm 0.16 \text{ g CH}_4\text{-C m}^{-2} \text{ yr}^{-1}$  or  $4.35 \pm 0.33 \text{ mg CH}_4\text{-C m}^{-2} \text{ d}^{-1}$  (Supplementary Figure 9: a). It should also be noted that since the investigation started January 1<sup>st</sup>, 2012, and ended on December 31<sup>st</sup>, 2016, the 2011 ~ 2012 and 2016 ~ 2017 winters\_ were only about half of the regular length. The diel CH<sub>4</sub> cycle of an average winter\_ day was characterized by one single emission peak around 10:30am ~ 17:30 pm (Figure 4: a1, b1, c1, d1, e1 and f1).

In spring\_, the Beilu'he site was a CH<sub>4</sub> source of  $0.90 \pm 0.37 \text{ g CH}_4\text{-C m}^{-2} \text{ yr}^{-1}$  (Supplementary Figure 9: b), accounting for 53% of annual CH<sub>4</sub> emissions, or  $1.81 \pm 0.22 \text{ mg CH}_4\text{-C m}^{-2} \text{ d}^{-1}$ . For a typical spring\_ (Figure 4: a2, b2, c2, d2, and e2), diel CH<sub>4</sub> emission usually started at around 10:00 am ~ 10:30 am, when the thin ice layer on the soil surface started to thaw. It then reached the peak at 12:30 pm ~ 13:30 pm. The emission peak started to weaken at around 15:30 pm ~ 16:00 pm and reached around zero or even turned into a small sink after 20:00 pm.

In summer\_, the Beilu'he site was a CH<sub>4</sub> sink of  $-0.99 \pm 0.18 \text{ g CH}_4\text{-C m}^{-2} \text{ yr}^{-1}$  (Supplementary Figure 9: c), or  $-13.28 \pm 0.38 \text{ mg CH}_4\text{-C m}^{-2} \text{ d}^{-1}$ . The diel cycle of CH<sub>4</sub> fluxes in summer\_ was characterized with two absorption peaks and one small emission peak (Figure 4: a3, b3, c3, d3, and e3). With T<sub>air</sub> increasing after sunrise, soils started to absorb atmospheric CH<sub>4</sub> and this soil uptake process reached its first peak at around 9:30 am ~ 10:30 am. After that, the continuously increasing T<sub>air</sub> turned to suppress CH<sub>4</sub> uptake and promote CH<sub>4</sub> emissions, likely due to different temperature sensitivities of methanotrophic and methanogenic bacteria. At

around 15:30pm ~ 16:00 pm, when Tair reached the maximum (Supplementary Figure 1: b), CH<sub>4</sub> emission also reached its peak. The following temperature decrease in the late afternoon again reversed the CH<sub>4</sub> uptake / emission process, and by sunset we observed another CH<sub>4</sub> sink peak. The rate of CH<sub>4</sub> sink then decreased again through the night with further decreasing temperature.

Autumn\_ was another season with a net CH<sub>4</sub> sink, with the season having the highest observed value for the site as a CH<sub>4</sub> sink in 2013 (Supplementary Figure 9: d). The CH<sub>4</sub> sink in autumn\_ varied between  $-0.69 \pm 0.19$  g CH<sub>4</sub>-C m<sup>-2</sup> (2015), and  $-1.59 \pm 0.33$  g CH<sub>4</sub>-C m<sup>-2</sup> (2013), with an average diel rate of  $-1.19 \pm 0.48$  g CH<sub>4</sub>-C m<sup>-2</sup> yr<sup>-1</sup> or  $-13.31 \pm 0.28$  mg CH<sub>4</sub>-C m<sup>-2</sup> d<sup>-1</sup>. The diel dynamics of autumn\_ CH<sub>4</sub> fluxes was like a letter “V”, with a single sink peak during 13:30 pm ~ 15:30 pm (Figure 4: a4, b4, c4, d4, and e4).

### 3.3 Response of Methane Fluxes to Changes in Environmental Factors

Diel fluxes of CH<sub>4</sub> were highly correlated with many biotic and abiotic environmental factors, either positively or negatively (Table 3). Positive factors include metagenomics of both methanotrophic ( $r = 0.52$ ,  $p < 0.01$ ) and methanogens ( $r = 0.49$ ,  $p < 0.01$ ) at 0 – 25 cm soils, ALT ( $r = 0.43$ ,  $p < 0.01$ ), and wind speed ( $r = 0.15$ ,  $p < 0.01$ ). Important negative factors include VPD ( $r = -0.26$ ,  $p < 0.01$ ), SWC at all depths (varied  $r$  values between  $-0.17$  and  $-0.26$ ,  $p < 0.01$ ), Tair ( $r = -0.11$ ,  $p < 0.01$ ), and air pressure ( $r = -0.15$ ,  $p < 0.01$ ). The correlation signal between CH<sub>4</sub> fluxes and Tsoil changed with soil depths (varied  $r$  values between  $-0.09$  and  $0.24$ ,  $p < 0.01$ ). Furthermore, path analysis results showed that Tsoil at 5cm and 10cm were the most important factors, which together contributed about 25% of the relative importance coefficient. Following these factors in importance were SWC at 80 cm (14%) and 20 cm (12%), and Tsoil at 20 cm (8%).

Further analyses suggested that dominant control factors of CH<sub>4</sub> fluxes also changed among different seasons. In spring\_, Rn was the most important factor, with a relative importance coefficient near 60%, followed by SHF at 5 cm (9%), and SWC at 20 cm (6%). Table 4 shows the results of PCA. In spring\_, PC1 explained 63% of the CH<sub>4</sub> variations, which was positively correlated with Tair, VPD, Rn, SHF of 15 cm, ALT, ΔI, SWC of 10 – 40 cm, Tsoil of 0 cm, Tsoil of 5 – 20 cm, Tsoil of 30 – 50 cm, and negatively correlated with wind speed. The PC2 explained about 23% of CH<sub>4</sub> fluxes variations. PC2 was positively correlated with wind speed, Tair, Rn, SHF of 15cm, but negatively correlated with VPD, ALT, ΔI, SWC 10 – 40 cm, Tsoil of 0 cm, Tsoil of 5 – 20 cm, and Tsoil of 30 – 50 cm. The first four principal components explained about 86% of the CH<sub>4</sub> variations.

In summer\_, CH<sub>4</sub> fluxes were most related with Tsoil at 100 cm and 200 cm, with an relative importance coefficient of about 30.2% and 26.5%, respectively. Other important environmental determinants of CH<sub>4</sub> fluxes were Tsoil at 70 cm (12.3%), and Tsoil at 0 – 20 cm (11.4%). The first four principal components explained about 88% of the CH<sub>4</sub> variations (Table 4). PC1 explained 70% of the CH<sub>4</sub> variations. PC1 was positively correlated with wind speed, Tair, VPD, SHF of 15 cm, ALT, ΔI, SWC of 50 – 160 cm, precipitation, Tsoil of 0 cm, Tsoil of 5 – 40 cm, Tsoil of 50 – 80 cm, and Tsoil of 100 – 200 cm, but negatively correlated with Rn and SWC of 10 – 40 cm. PC2 was positively correlated with wind speed, Tair, VPD, Rn, SHF of 15cm, SWC of 10 – 40 cm, Tsoil of 0 cm, but negatively correlated with ALT, ΔI, SWC of 50 – 160 cm, precipitation, Tsoil of 5 – 40 cm, Tsoil of 50 – 80 cm, and Tsoil of 100 – 200 cm.

In autumn\_, Rn and Tsoil at 5 – 20 cm had the highest relative importance coefficients for explaining the CH<sub>4</sub> flux variation. The first four principal components explained about 86% of the CH<sub>4</sub> variations (Table 4). PC1 explained 69% of the CH<sub>4</sub> variations. PC1 was positively

correlated with Tair, VPD, Rn, SHF of 15 cm, ALT,  $\Delta I$ , SWC of 10 – 40 cm, SWC of 50 – 160 cm, Tsoil of 0 cm, Tsoil of 5 – 40 cm, Tsoil of 50 – 80 cm, and Tsoil of 100 – 200 cm, but negatively correlated with wind speed. PC2 was positively correlated with wind speed, Tair, Rn, SHF of 15 cm, ALT,  $\Delta I$ , Tsoil of 0 cm, and Tsoil of 5 – 40 cm, but negatively correlated with VPD, SWC of 10 – 40 cm, SWC of 50 – 60 cm, Tsoil of 50 – 80 cm, and Tsoil of 100 – 200 cm.

During winter\_, Rn was again the most important factor (34% relative importance coefficient), followed by Tsoil at 0 – 40 cm (27% in total), and SHF of 15 cm (17% in total), in determining CH<sub>4</sub> fluxes. The first four principal components explained about 96% of the CH<sub>4</sub> variations (Table 4). PC1 explained 75% of the CH<sub>4</sub> variations. PC1 was positively correlated with wind speed, Tair, VPD, Rn, SHF of 15 cm,  $\Delta I$ , Tsoil of 0 cm, and Tsoil of 5 – 20 cm. PC2 explained 21% of the CH<sub>4</sub> variations. PC2 was positively correlated with wind speed, Tair, Rn, SHF of 15 cm, and  $\Delta I$ , but negatively correlated with VPD, Tsoil of 0 cm, and Tsoil of 5 – 20 cm.

### **3.4 Empirical Model Comparison for Different CH<sub>4</sub> Flux Season Classification System**

Lastly, we also compared how different season definitions, including the methods of SMT, VCT, JMC, and VPC, may have impacted the predictability of CH<sub>4</sub> fluxes. We established empirical maximum likelihood models between all environmental factors and diel CH<sub>4</sub> fluxes over each season, and then compared modeled CH<sub>4</sub> fluxes and field observations under those methods of different seasonal definitions (Figure 5). We found that the agreement between modeled and observed CH<sub>4</sub> fluxes, using the new SMT method, reached  $R^2 = 0.28$ , almost twice that of the VPC ( $R^2 = 0.17$ ) and VCT ( $R^2 = 0.14$ ) methods, and more than three times that of the JMC method ( $R^2 = 0.08$ ; Figure 5). Hence, the comparison suggested that our new method could better model CH<sub>4</sub> fluxes over a year. The use of the traditional plant growing season versus

nongrowing season definitions may also underestimate or overestimate CH<sub>4</sub> sinks or sources, especially when many studies assume CH<sub>4</sub> is close to zero during the plant nongrowing season. Furthermore, the new SMT method accurately captures the impact of spring\_m and autumn\_m permafrost thawing / freezing cycles on CH<sub>4</sub> fluxes, and the different preferable environments for methanogens and methanotrophic bacteria during the summer\_m season, while conventional methods do not.

## **4. Discussion**

### **4.1 Annual, Season mean and Diel Variability**

Our results suggested that the alpine steppe ecosystem in Beilu'he was a CH<sub>4</sub> sink of about  $-0.86 \pm 0.23 \text{ g CH}_4 - \text{C m}^{-2} \text{ yr}^{-1}$  during the study period of 2012-2016. This sink strength is larger than that of previous reports from other sites of the QTP (Cao et al., 2008; Wei et al., 2012; Li et al., 2012; Song et al., 2015; Chang and Shi, 2015), and many other high-latitude Arctic tundra ecosystems, like northeast Greenland (Jørgensen et al., 2015), western Siberia (Liebner et al., 2011), and Alaska (Whalen et al., 1992; Zhuang et al., 2004; Whalen, 2005). Different soil hydrothermal conditions, which previous studies have shown will greatly influence CH<sub>4</sub> cycles in permafrost regions (Spahni et al., 2011; Kirschke et al., 2013), may partly explain the site difference in CH<sub>4</sub> dynamics. For example, compared to the wet and often snow-covered high-latitude Arctic tundra ecosystems, there is no or little snow cover during the cold season in the QTP alpine steppes (Supplementary Table 1). During winter\_, the Beilu'he meteorological data shows that the snow-cover time < 33.7h, SWC of 0-40cm within footprint < 7.6% from 2012 to 2016 (Supplementary Table 1), is far below high-latitude Arctic tundra ecosystems. Jansson and Taş (2014) pointed out that relatively dry soils could facilitate the oxidation of CH<sub>4</sub>, since the increased number of gaps between soil particles in dry soils enhances the diffusion of

oxygen (O<sub>2</sub>) and CH<sub>4</sub> molecules and promotes aerobic respiration of soil microorganisms (Wang et al., 2014; Song et al., 2015). Meanwhile, unfrozen or capillary water found in cold-season permafrost soils ensures sufficient soil moisture for microbial activities, even in relatively drier and cold soils (Panikov and Dedysh, 2000; Rivkina et al., 2004). In addition, many previous studies used static chambers in CH<sub>4</sub> measurements, and may not have included a plant non-growing season (Wei et al., 2015a; Wang et al., 2014). Static chambers could underestimate CH<sub>4</sub> uptake because of the additional chamber heating-induced CH<sub>4</sub> emissions and frequent measurement gaps from overheating preventive shutdowns (Sturtevant et al., 2012).

We argued that seasonal freezing and thawing dynamics may be a key reason to explain the site's seasonal difference in CH<sub>4</sub> dynamics. Freezing and thawing processes are typical characteristics of the QTP permafrost (Wang et al., 2008; Wang et al., 2000; Qin et al., 2016). Our work suggests that freezing and thawing dynamics have played a critical role in governing permafrost seasonal and diel CH<sub>4</sub> cycling. For instance, while both spring\_ and autumn\_ are active seasons for the freeze-thaw dynamics of top soil layers and share many similarities, they have opposite CH<sub>4</sub> processes—soils emit CH<sub>4</sub> during spring\_ (Supplementary Figure 9: b), but consume CH<sub>4</sub> during autumn\_ (Supplementary Figure 9: d). We hypothesize that the difference in the freezing and thawing processes of the two seasons may have played a critical role in determining the direction of CH<sub>4</sub> dynamics. In spring\_, the SWC of 10cm is 12.4%, 20-40cm is 9.2%, 80cm is 11.4%, and 160cm is 13.6% (Supplementary Table 1), the active soil layer thaws from top to bottom (Jin et al., 2000; Cao et al., 2017), and the permafrost table is very shallow (about 10 ~ 45 cm), and is generally water proof (Wu and Zhang, 2008; Song et al., 2015; Lin et al., 2015). The water thawed during the day time would freeze again at night on the soil surface (Supplementary Figure 10: a; Shi et al., 2006; Wu and Zhang, 2010b). The thin-ice layer

could stop atmospheric gases of CH<sub>4</sub> and O<sub>2</sub> from getting into the soils (Gazovic et al., 2010). During autumn\_, the SWC of 10cm is 15.3%, 20-40cm is only 9.4%, but 80cm is 13.6%, and 160cm can up to 21.0% (Supplementary Table 1), however, soils are bidirectionally frozen from both top (ground surface) and bottom, the permafrost table, which is about 200~400 cm deep ; (Supplementary Figure 8; Wu and Zhang, 2010a), doesn't form a layer of thin ice during the nighttime surface soil freezing, because on the one hand, the frozen soil of the ground surface (about 0-40cm) prevents the outside liquid water from permeating. On the other hand, the freezing itself will reduce the liquid water content in the soil (Ma et al., 2015) Therefore, it creates finely closed anaerobic gaps that allow CH<sub>4</sub> and O<sub>2</sub> gases into deep soils (about 50~400cm; Mastepanov et al., 2008; Mastepanov et al., 2013; Zona et al., 2016). Meanwhile, the temperature of deep soils (about 50~400cm), still remains at a relatively high level (Supplementary Figure 10: b), and methanotrophic bacteria there are still active at this high T<sub>soil</sub> (Figure 2). This could be one important mechanism for autumn\_ soil CH<sub>4</sub> consumption. In addition, in principal it was also possible that the observed seasonal variation in CH<sub>4</sub> flux may actually arise from the spatial variation of the footprint covered by the eddy covariance site (within 175m), given that prevalent wind direction changes seasonally (Supplementary Figure 4). Nonetheless, we found that the same vegetation species and soil exist in different directions to the tower within the footprint (Supplementary Figure 11). Hence this spatial vegetation and soil homogeneity further confirm that seasonal soil freezing and thawing differences may likely be the main explanation for seasonal CH<sub>4</sub> variations.

Furthermore, we suggested that the specific autumn\_ soil vertical structure may help explain why the site was a CH<sub>4</sub> sink, unlike the CH<sub>4</sub> source in spring\_. The sequential probing data enables us to establish a rough estimate on the soil vertical structure during the autumn\_

thawing–freezing process, in which the vertical distribution of clay, sandy soils, and soil organic layers was mixed like a multi–layer hamburger structure, rather than forming a gradual change (Figure 6: e). As the soil profile has a different density, thermal conductivity, heat of phase transition, salinity of soil, and so on, we boldly conjecture that, similarly, the  $T_{\text{soil}}$ , SWC, and soil microbial activities also had this hamburger type of vertical distribution. As a result, layers of frozen and thawed soils were not changing gradually but appeared like a hamburger structure too. This hamburger–like soil vertical structure trapped high concentrations of soil water between the frozen layers, which was therefore highly anaerobic and suitable for  $\text{CH}_4$  production. Also, because of the hamburger–like structure, it fueled speculation that biogenic  $\text{CH}_4$  between frozen layers could not escape in autumn\_. The biogenic  $\text{CH}_4$  was trapped until the ACL soil layer was completely frozen in late autumn\_, and in some warmer years until early winter\_ and created frost cracks. This enabled it to escape and may explain why there was a large burst of  $\text{CH}_4$  emissions in late autumn\_ and early winter\_ and may also explain the constant weak  $\text{CH}_4$  emission through the winter\_ season, although methanogenic bacteria may have stopped functioning in the low temperature of winter\_. Of course, this will need further study and necessitates direct data collection in the field.

## **4.2 Impacts of Environmental, Permafrost, and Microbial Activities on $\text{CH}_4$ Fluxes**

Our results demonstrated the important roles of climate, freezing and thawing dynamics, and soil microbe activities in regulating the direction and amount of  $\text{CH}_4$  exchanges between the atmosphere and ecosystems in permafrost areas. The key role of the above factors and processes was also confirmed by the better representation of seasonal  $\text{CH}_4$  cycles by our new seasonal division method based on soil microbes, temperature, and permafrost dynamics rather than  $T_{\text{air}}$  or vegetation phenology. Here, we further discuss potential mechanisms of how environmental



(including air and soil heat and water), freezing and thawing processes, and soil microbes control the production and absorption of CH<sub>4</sub>.

First, it is noteworthy that both the strength and direction of correlations between CH<sub>4</sub> fluxes, SWC, and T<sub>soil</sub> parameters changed with soil depths, particularly during spring\_ and autumn\_, when active layer soils shifted between thawing and freezing regularly. The positive and negative CH<sub>4</sub> flux correlations with T<sub>soil</sub> and SWC may suggest that the impacts of T<sub>soil</sub> and SWC on CH<sub>4</sub> fluxes shall be treated as a holistic process, rather than as separate ones. For instance, in autumn\_, the correlation between CH<sub>4</sub> fluxes and T<sub>soil</sub> or SWC was positive at some soil depths, but negative at some other depths, reaching the maximum at the depth of 80 cm. Further, *in situ* observations suggested that soil organic matter and soil microbe amount were also at a very high level at this depth, highlighting that the regulation of soil abiotic factors on CH<sub>4</sub> cycling may be well influenced by soil biotic activities. In addition, the holistic soil heat–water process could also determine the concentration of soil inorganic ions, particularly during spring\_ and autumn\_, which were critical factors controlling the amount of soil unfrozen water. Soil unfrozen water in winter perhaps being important for maintaining soil microbial activities (Panikov and Dedysh, 2000; Rivkina et al., 2004); and in the future work we will include data acquiring of soil unfrozen water and test its role in regulating CH<sub>4</sub> exchanges in permafrost regions.

T<sub>air</sub> and precipitation impact CH<sub>4</sub> fluxes indirectly through their influences on T<sub>soil</sub> and SWC (Zhuang et al., 2004; Lecher et al., 2015). Such indirect influences may often be characterized with time–lagged effects (Koven et al., 2011). For instance, post–drought rainfall events in summer\_ can first promote soil CH<sub>4</sub> consumption (summer\_ of 2014). This is because certain soil moisture is needed for methanogenic bacteria to function (Del et al., 2000; Luo et al.,

2012). Yet, prolonged rainfall will eventually cause CH<sub>4</sub> fluxes to change from negative (soils consume CH<sub>4</sub>) to positive (soils emit CH<sub>4</sub>) fluxes (for example, 168<sup>th</sup> to 183<sup>th</sup> of 2015, Figure 3: d). After rainfall events, CH<sub>4</sub> flux gradually turned negative again with the decrease of SWC. As a result of these time-lagged effects, the correlation coefficient between CH<sub>4</sub> fluxes and precipitation often appears very low, although still statistically significant.

Second, soil methanogenic and methanotrophic bacteria could co-exist with different optimal niches (e.g., ranges of T<sub>air</sub> / T<sub>soil</sub> and SWC; Zhuang et al., 2013; Lau et al., 2015; Wei et al., 2015a). For example, the CH<sub>4</sub> diel cycle in summer\_ was found to have two strong consumption peaks and one weak emission peak (Figure 4: a3, c3, d3, e3). The timing of these different peaks may well reflect the different environmental requirements for the dominance of methanogens and methanotrophic bacteria. Furthermore, methanogens may have a broader functional temperature range than methanotrophic bacteria (Kolb, 2009; Lau et al., 2015; Yang et al., 2016). This is also evident, for example, from the diel CH<sub>4</sub> cycle in autumn\_ when CH<sub>4</sub> consumption was minimal at both lowest and highest T<sub>air</sub> (Figure 4: a4, b4, c4, d4, e4).

The complex relationships between CH<sub>4</sub> fluxes and environmental factors make it a grand challenge to predict the future of the QTP CH<sub>4</sub> budget under a changing climate. For instance, it has been generally believed that the ALT will increase under projected warming (Wu and Liu, 2004). The positive correlation between CH<sub>4</sub> fluxes and ALT found here suggests that the QTP permafrost CH<sub>4</sub> sink may thus be weakened. However, the negative correlation between CH<sub>4</sub> flux and T<sub>air</sub> may lead to a different conclusion. Incorporating our findings and high-resolution data into mechanistic CH<sub>4</sub> models is therefore needed to enhance our capacity in predicting future CH<sub>4</sub> budgets. Earth system models have been introduced to estimate CH<sub>4</sub> dynamics (Curry, 2007; Spahni et al., 2011; Bohn et al., 2015). For example, using a terrestrial ecosystem

modelling approach, Zhuang et al. (2004) estimated the average QTP permafrost CH<sub>4</sub> sink of -0.08 g C m<sup>-2</sup> yr<sup>-1</sup>, much smaller than our field-based CH<sub>4</sub> estimate (-0.86 ± 0.23 g CH<sub>4</sub>-C m<sup>-2</sup> yr<sup>-1</sup>). Current CH<sub>4</sub> models focus on the regulation of CH<sub>4</sub> processes by temperature and SWC, and usually lack high-resolution data for model parameterization (Bohn et al., 2015). Data interpolation and the use of average values of certain environmental factors are normal practices in most models (Zhuang et al., 2004), which may overlook the impacts of environmental variations on CH<sub>4</sub> dynamics. For example, at Beilu'he, Tair on a typical summer day (e.g., July 6<sup>th</sup>, 2013) could vary between -6 °C and 28 °C, a difference of 34 °C. The resulting diel mean temperature, 17 °C, is beyond the range of methanotrophic bacteria's preferable temperature of 20~30 °C (Segers, 1998; Steinkamp et al., 2001; Yang et al., 2016). Therefore, models using diel mean temperature as an input may estimate the site as a net CH<sub>4</sub> sink. However, field observations show a source with a sink only during a short period (8:30am~11:30 am), on July 6<sup>th</sup>, 2013, because the short period of the sink was offset by the source over the remaining 21 hours. Furthermore, half-hourly SWC was well related with the waterproof role by the permafrost layer during spring\_ and autumn\_ (Figure 6: a). However, because of the shortage of high temporal resolution data, half-diel or diel mean SWC data are often used in many previous studies (Zhu et al., 2004; Jiang et al., 2010; Wei et al., 2015b), which could not correctly show the regulation of permafrost soil properties that are critical for CH<sub>4</sub> dynamics. As another example, Tsoil of 0 – 50 cm depth is one of the most important factors related to CH<sub>4</sub> fluxes (Mastepanov et al., 2008). However, many studies used Tair or re-analyzed deep Tsoil instead (Zhu et al., 2004; Bohn et al., 2015; Oh et al., 2016). Because the active layer is not homogeneous, but with different thermal conductivities during the freezing and thawing process, the use of Tair or deep Tsoil brings in large uncertainties in CH<sub>4</sub> modelling. Future research

needs to improve mechanistic understanding of CH<sub>4</sub> dynamics and their biotic and abiotic control factors, and to conduct more high-resolution and long-term field monitoring.

#### **4.3 The Classification System of the Four Seasons for CH<sub>4</sub> Studies**

Our study is also different from the majority of earlier studies in seasonal definitions (Treat et al., 2014; Wang et al., 2014; Wei et al., 2015a; Song et al., 2015). Here, we adopted a new classification system of the four seasons based on 0 – 25 cm soil depth bacterial activities (Figure 2), T<sub>soil</sub> of 0 – 40 cm (Supplementary Figure 6: a), and ALT (Supplementary Figure 8), rather than the conventional methods based on T<sub>air</sub> and vegetation dynamics (Chen et al., 2011; McGuire et al., 2012). Previous studies indicated that changes in CH<sub>4</sub> fluxes are regulated by soil microbes, and activities of soil microbes are not limited to the warm season (Zhuang et al., 2004; Lau et al., 2015; Yang et al., 2016). For instance, in March and November, we found the amount of gene expression by methanogens and methanotrophs at 0 – 25 cm soils were about 16.8% and 35.6% (Figure 2), respectively, suggesting there are still strong microbial activities during the cold and dry season. Therefore, our new method of defining the four seasons from the top soil's biotic and abiotic features better captures the pattern of CH<sub>4</sub> dynamics throughout a year.

#### **5. Conclusions**

Our field data indicates that there was a large CH<sub>4</sub> sink in the QTP permafrost area during recent years. The strength of this CH<sub>4</sub> sink is larger than previous studies in the region and many high-latitude tundra ecosystems. This study highlights the complexity of environmental controls, including soil heat–water processes, permafrost freezing and thawing dynamics, and soil microbial activities, on CH<sub>4</sub> cycling. This complexity implies that linear interpolation and extrapolation from site-level studies could introduce large uncertainties in CH<sub>4</sub> flux estimation. Future quantification of CH<sub>4</sub> dynamics in permafrost regions needs to account for the effects of

complex environmental processes, including freezing and thawing, and the interaction between heat and water, as well as microbial activities. Our findings also highlight the importance of conducting more high-resolution and long-term field monitoring in permafrost regions for better understanding and modelling of permafrost CH<sub>4</sub> cycling under a changing climate.

## **Acknowledgements**

We would like to thank Yongzhi Liu, Jing Luo, Ji Chen, Guilong Wu, Wanan Zhu, Zhipeng Xiao, and Chang Liao for their tremendous help in collecting field data over all these years. We also want to pay tribute and gratitude to the late Xiaowen Cui for his contribution to our many field adventures. We thank John McCabe for proofreading the manuscript. This study was supported by the National Natural Science Foundation of China (41501083), Opening Research Foundation of Key Laboratory of Land Surface Process and Climate Change in Cold and Arid Regions, Chinese Academy of Sciences (LPCC201307), and Opening Research Foundation of Plateau Atmosphere and Environment Key Laboratory of Sichuan Province (PAEKL – 2014 – C3). A. C. acknowledges the support from a Purdue University Forestry and Natural Resources research scholarship. The data generated in this study will be freely available on the Asia Flux regional network server (<https://db.cger.nies.go.jp/asiafluxdb/>).

## **Reference**

- Bohn T., Melton J., Ito A.: WETCHIMP–WSL: intercomparison of wetland methane emissions models over West Siberia, *Biogeosciences*, 12, 3321 – 3349, 2015.
- Burba, G. G., Mcdermitt, D. K., and Grelle, A.: Addressing the influence of instrument surface heat exchange on the measurements of CO<sub>2</sub> flux from open-path gas analyzers. *Glob. Change Biol.*, 14(8), 1854 – 1876, 2008.

649 Cao G., Xu X., and Long R.: Methane emissions by alpine plant communities in the Qinghai–  
650 Tibet Plateau, *Biol. Lett.*, 4, 681 – 684, 2008.

651 Cao B., Gruber S., Zhang T.: Spatial variability of active layer thickness detected by ground–  
652 penetrating radar in the Qilian Mountains, Western China, *J. Geophys. Res. Earth Surf.*,  
653 122, 574 – 591, 2017.

654 Cate, R. B., and Nelson, L. A.: A simple statistical procedure for partitioning soil test correlation  
655 data into two classes, *Soil Sci. Soc. Am. J.*, 35(4), 658 – 660, 1971.

656 Chang R., Miller C., and Dinardo S.: Methane emissions from Alaska in 2012 from CARVE  
657 airborne observations, *Proc. Natl. Acad. Sci. U. S. A.*, 111, 16694 – 16699, 2014.

658 Chang S. and Shi P.: A review of research on responses of leaf traits to climate change, *Chin. J.*  
659 *Plant Ecol.*, 39, 206 – 216, 2015.

660 Chen W., Wolf B., and Zheng X.: Annual methane uptake by temperate semiarid steppes as  
661 regulated by stocking rates, aboveground plant biomass and topsoil air permeability.  
662 *Glob. Change Biol.*, 17, 2803 – 2816, 2011.

663 Curry C.: Modeling the soil consumption at atmospheric methane at the global scale. *Glob.*  
664 *Biogeochem. Cycles*, 21, 1 – 15, 2007.

665 Dengel S., Zona D., and Sachs T.: Testing the applicability of neural networks as a gap–filling  
666 method using CH<sub>4</sub> flux data from high latitude wetlands. *Biogeosciences*, 10, 8185 – 8200,  
667 2013.

668 Del G., Parton W., and Mosier A.R.: General CH<sub>4</sub> oxidation model and comparisons of CH<sub>4</sub>  
669 oxidation in natural and managed systems, *Glob. Biogeochem. Cycles*, 14, 999 – 1019,

2000.

Falge, E., Baldocchi, D., and Olson, R.: Gap filling strategies for defensible annual sums of net ecosystem exchange, *Agric. For. Meteorol.*, 107(1), 43 – 69, 2001.

Gažovič M., Kutzbach L., and Schreiber P.: Diurnal dynamics of CH<sub>4</sub> from a boreal peatland during snowmelt. *Tellus, B*, 62, 133 – 139, 2010.

IPCC, climate change 2013: the physical science basis. Contribution of working group I to the fifth assessment report of the intergovernmental panel on climate change., 2013.

Jansson, J. K. and Tas, N.: The microbial ecology of permafrost, *Nat. Rev. Microbiol.*, 12, 414, 2014.

Jiang C., Yu G., and Fang H.: Short-term effect of increasing nitrogen deposition on CO<sub>2</sub>, CH<sub>4</sub> and N<sub>2</sub>O fluxes in an alpine meadow on the Qinghai–Tibetan Plateau, China, *Atmos. Environ.*, 44, 2920 – 2926, 2010.

Jin H., Li S., and Cheng G.: Permafrost and climatic change in China, *Glob. Planet. Change*, 26, 387 – 404, 2000.

Jørgensen, C. J., Johansen, K. M. L., and Westergaard–Nielsen, A.: Net regional methane sink in High Arctic soils of northeast Greenland, *Nat. Geosci.*, 8, 20, 2015.

Kirschke, S., Bousquet, P., and Ciais, P.: Three decades of global methane sources and sinks, *Nat. Geosci.*, 6, 813, 2013.

Kolb, S.: The quest for atmospheric methane oxidizers in forest soils, *Environ. Microbiol. Rep.*, 1, 336 – 346, 2009

Koven C.D., Ringer B., and Friedlingstein P.: Permafrost carbon–climate feedbacks accelerate

691 global warming, *Proc. Natl. Acad. Sci. U. S. A.*, 108, 14769 – 14774, 2011.

692 Lau M., Stackhouse B.T., and Layton A.C.: An active atmospheric methane sink in high Arctic  
693 mineral cryosols. *ISME J.*, 9, 1880 – 1891, 2015.

694 Lecher A.L., Dimova N., and Sparrow K.J.: Methane transport from the active layer to lakes in  
695 the Arctic using Toolik Lake, Alaska, as a case study, *Proc. Natl. Acad. Sci. U. S. A.*, 112,  
696 3636 – 3640, 2015.

697 Lee, X., Massman, W., and Law, B. (Eds.): *Handbook of micrometeorology: a guide for surface*  
698 *flux measurement and analysis (Vol. 29)*, Springer Science and Business Media, 2006.

699 Li K., Gong Y., and Song W.: Responses of CH<sub>4</sub>, CO<sub>2</sub> and N<sub>2</sub>O fluxes to increasing nitrogen  
700 deposition in alpine grassland of the Tianshan Mountains, *Chemosphere*, 88, 140 – 143,  
701 2012.

702 Liebner S., Zeyer J., and Wagner D.: Methane oxidation associated with submerged brown  
703 mosses reduces methane emissions from Siberian polygonal tundra, *J. Ecol.*, 99, 914 – 922,  
704 2011.

705 Lin Z., Burn C.R., and Niu F.: The Thermal Regime, including a Reversed Thermal Offset, of  
706 Arid Permafrost Sites with Variations in Vegetation Cover Density, Wudaoliang Basin,  
707 Qinghai–Tibet Plateau. *Permafr. Periglac. Process.*, 26, 142 – 159, 2015.

708 Loescher, H. W., Law, B. E., and Mahrt, L: Uncertainties in, and interpretation of, carbon flux  
709 estimates using the eddy covariance technique. *J. Geophys. Res. Atmos.*, 111(D21), 2006.

710 Luo G.J., Brüggemann N., and Wolf B.: Decadal variability of soil CO<sub>2</sub>, NO, N<sub>2</sub>O, and CH<sub>4</sub>  
711 fluxes at the Höglwald Forest, Germany. *Biogeosciences*, 9, 1741 – 1763, 2012.



712 Mastepanov M., Sigsgaard C., and Dlugokencky E.J.: Large tundra methane burst during onset  
 713 of freezing. *Nature*, 456, 628 – 30, 2008.

714 Mastepanov, M., Sigsgaard, C., and Tagesson, T.: Revisiting factors controlling methane  
 715 emissions from high-Arctic tundra, *Biogeosciences*, 10(7), 5139, 2013.

716 Ma W., Zhang L., and Yang C.: Discussion of the applicability of the generalized Clausius–  
 717 Clapeyron equation and the frozen fringe process, *Earth-Sci. Rev.*, 142, 47-59, 2015.

718 Mauder, M., Cuntz, M., and Drüe, C.: A strategy for quality and uncertainty assessment of long–  
 719 term eddy–covariance measurements. *Agric. For. Meteorol.*, 169, 122 – 135, 2013.

720 McGuire A.D., Christensen T.R., and Hayes D.: An assessment of the carbon balance of Arctic  
 721 tundra: Comparisons among observations, process models, and atmospheric inversions,  
 722 *Biogeosciences*, 9, 3185 – 3204, 2012.

723 Moncrieff, J., Clement, R., and Finnigan, J.: Averaging, detrending, and filtering of eddy  
 724 covariance time series. In *Handbook of micrometeorology* (pp. 7 – 31), Springer  
 725 Netherlands, 2004.

726 Muller, S. W. Permafrost or permanently frozen ground and related engineering problems, 1947.

727 Oh Y., Stackhouse B., and Lau M.: A scalable model for methane consumption in arctic mineral  
 728 soils. *Geophys. Res. Lett.*, 43, 5143 – 5150, 2016.

729 Panikov N.S. and Dedysh S.N.: Cold season CH<sub>4</sub> and CO<sub>2</sub> emission from boreal peat bogs (West  
 730 Siberia): Winter fluxes and thaw activation dynamics, *Glob. Biogeochem. Cycles*, 14, 1071  
 731 – 1080, 2000.

732 Papale, D., Reichstein, M., and Aubinet, M.: Towards a standardized processing of Net

733 Ecosystem Exchange measured with eddy covariance technique: algorithms and uncertainty  
 734 estimation. *Biogeosciences*, 3(4), 571 – 583, 2006.

735 Patra P.K. and Kort E.A.: Regional Methane Emission Estimation Based on Observed  
 736 Atmospheric Concentrations (2002 – 2012), *J. Meteor. Soc. Japan. Ser. II*, 94, 91 – 113,  
 737 2016.

738 Qin, Y., Wu T., and Li R., Using ERA-Interim reanalysis dataset to assess the changes of ground  
 739 surface freezing and thawing condition on the Qinghai–Tibet Plateau. *Environ. Earth Sci.*,  
 740 75(9): 1-13, 2016.

741 Rigby M., Prinn R.G., and Fraser P.J.: Renewed growth of atmospheric methane, *Geophys. Res.*  
 742 *Lett.*, 35, 2 – 7, 2008.

743 Rivkina E., Laurinavichius K., and McGrath J.: Microbial life in permafrost, *Adv. Space Res.*,  
 744 33, 1215 – 1221, 2004.

745 Segers R.: Methane production and methane consumption—a review of processes underlying  
 746 wetland methane fluxes [Review], *Biogeochem.*, 41, 23 – 51, 1998.

747 Shi P., Sun X., and Xu L.: Net ecosystem CO<sub>2</sub> exchange and controlling factors in a steppe–  
 748 Kobresia meadow on the Tibetan Plateau. *Sci. China Ser. D-Earth Sci.*, 49, 207 – 218, 2006.

749 Song, W., Wang, H., and Wang, G.: Methane emissions from an alpine wetland on the Tibetan  
 750 Plateau: Neglected but vital contribution of the non–growing season, *J. Geophys. Res.*  
 751 *Biogeosci.*, 120, 1475 – 1490, 2015.

752 Spahni R., Wania R., and Neef L.: Constraining global methane emissions and uptake by  
 753 ecosystems. *Biogeosciences*, 8, 1643 – 1665, 2011.

754 Steinkamp R., Butterbach–Bahl K., and Papen H.: Methane oxidation by soils of an N limited  
 755 and N fertilized spruce forest in the Black Forest, Germany, *Soil. Biol. Biochem.*, 33, 145 –  
 756 153, 2001.

757 Sturtevant C.S., Oechel W.C., and Zona D.: Soil moisture control over autumn season methane  
 758 flux, Arctic Coastal Plain of Alaska, *Biogeosciences*, 9, 1423 – 1440, 2012.

759 Treat C.C., Wollheim W.M., and Varner R.K.: Temperature and peat type control CO<sub>2</sub> and CH<sub>4</sub>  
 760 production in Alaskan permafrost peats, *Glob. Chang. Biol.* 20, 2674 – 2686, 2014.

761 Vickers, D., and Mahrt, L.: Quality control and flux sampling problems for tower and aircraft  
 762 data. *J. Atmos. Ocean. Technol.*, 14(3), 512 – 526, 1997.

763 Wang G., Li Y., and Wang Y.: Effects of permafrost thawing on vegetation and soil carbon pool  
 764 losses on the Qinghai–Tibet Plateau, China, *Geoderma*, 143, 143 – 152, 2008.

765 Wang S., Jin H., Li S.: Permafrost degradation on the Qinghai–Tibet Plateau and its  
 766 environmental impacts. *Permafr. Periglac. Process.*, 11, 43 – 53, 2000.

767 Wang Y., Liu H., and Chung H.: Non–growing season soil respiration is controlled by freezing  
 768 and thawing processes in the summer monsoon-dominated Tibetan alpine grassland. *Glob.*  
 769 *Biogeochem. Cycles*, 28, 1081 – 1095, 2014.

770 Wei D., Ri X., and Wang Y.: Responses of CO<sub>2</sub>, CH<sub>4</sub> and N<sub>2</sub>O fluxes to livestock enclosure in an  
 771 alpine steppe on the Tibetan Plateau, China. *Plant Soil*, 359, 45 – 55, 2012.

772 Wei D., Ri X., and Tarchen T.: Considerable methane uptake by alpine grasslands despite the  
 773 cold climate: In situ measurements on the central Tibetan Plateau, 2008 – 2013, *Glob.*  
 774 *Chang Biol.*, 21, 777 – 788, 2015a.

775 Wei D., Tarchen T., and Dai D.: Revisiting the role of CH<sub>4</sub> emissions from alpine wetlands on  
 776 the Tibetan Plateau: Evidence from two in situ measurements at 4758 and 4320 m above sea  
 777 level, *J. Geophys. Res. Biogeosci.*, 120, 1741 – 1750, 2015b.

778 Whalen, S. C. and Reeburgh, W. S.: Consumption of atmospheric methane by tundra  
 779 soils. *Nature*, 346, 160, 1990.

780 Whalen S.C.: Biogeochemistry of Methane Exchange between Natural Wetlands and the  
 781 Atmosphere. *Environ. Eng. Sci.*, 22, 73 – 94, 2005.

782 Whalen S.C., Reeburgh W.S., and Barber V.A.: Oxidation of methane in boreal forest soils: a  
 783 comparison of seven measures. *Biogeochemistry*, 16, 181 – 211, 1992.

784 Wu Q. and Liu Y.: Ground temperature monitoring and its recent change in Qinghai–Tibet  
 785 Plateau, *Cold Reg. Sci. Technol.*, 38, 85 – 92, 2004.

786 Wu Q. and Zhang T.: Recent permafrost warming on the Qinghai–Tibetan Plateau. *J. Geophys.*  
 787 *Res. Atmos.* 113, 1 – 22, 2008.

788 Wu Q. and Zhang T.: Changes in active layer thickness over the Qinghai–Tibetan Plateau from  
 789 1995 to 2007, *J. Geophys. Res. Atmos.*, 115, D09107, 2010a.

790 Wu Q. Zhang T., and Liu Y.: Permafrost temperatures and thickness on the Qinghai–Tibet  
 791 Plateau, *Glob. Planet. Change*, 72, 32 – 38, 2010b.

792 Yang S., Wen X., and Shi Y.: Hydrocarbon degraders establish at the costs of microbial richness,  
 793 abundance and keystone taxa after crude oil contamination in permafrost environments. *Sci.*  
 794 *Rep.*, 6, 37473, 2016.

795 Zhu X., Zhuang Q., and Chen M.: Net exchanges of methane and carbon dioxide on the

Qinghai–Tibetan Plateau from 1979 to 2100. *Environ. Res. Lett.*, 10, 85007. 2004.

Zhuang Q., Melillo J.M., and Kicklighter D.W.: Methane fluxes between terrestrial ecosystems and the atmosphere at northern high latitudes during the past century: A retrospective analysis with a process–based biogeochemistry model. *Glob. Biogeochem. Cycles*, 18(3), 2004.

Zhuang Q., Chen M., and Xu K.: Response of global soil consumption of atmospheric methane to changes in atmospheric climate and nitrogen deposition. *Glob. Biogeochem. Cycles*, 27, 650 – 663, 2013.

Zona D., Gioli B., and Commane R.: Cold season emissions dominate the Arctic tundra methane budget. *Proc. Natl. Acad. Sci. U. S. A.*, 113, 40 – 45, 2016.

816 **Table 1.** Soil characteristics at the eddy covariance flux study site

| Soil depth | Soil type             | Gravel             | SOC                | Microbial        | pH  | DBD                | SWC   | Total N                              |
|------------|-----------------------|--------------------|--------------------|------------------|-----|--------------------|-------|--------------------------------------|
| cm         |                       | content            |                    | Numbers          |     |                    |       |                                      |
|            |                       | g kg <sup>-1</sup> | g kg <sup>-1</sup> | ×10 <sup>4</sup> |     | g cm <sup>-3</sup> | %     | ×10 <sup>3</sup> mg kg <sup>-1</sup> |
| 0 – 20     | clay                  | 22.3               | 2.8                | 3.44             | 8.7 | 1.75               | 18.26 | 0.87                                 |
| 20 – 50    | Silty<br>clay         | 12.6               | 1.7                | 3.82             | 8.4 | 1.73               | 11.52 | 1.02                                 |
| 50 – 120   | silt and<br>fine sand | 3.4                | 1.3                | 3.67             | 8.4 | 1.72               | 12.57 | 1.18                                 |
| 120 – 160  | silt and<br>fine sand | 2.8                | 26.4               | 5.44             | 5.1 | 1.68               | 24.69 | 2.46                                 |
| 160 – 200  | silt and<br>fine sand | 1.6                | 13.6               | 4.39             | 6.8 | 1.68               | 22.45 | 2.03                                 |

817 **Note:** Gravel content diameter ≥ 0.5cm. SOC is soil organic content, DBD is dry bulk density, and  
818 SWC is soil water content.

819

820

821

822

823

824

825

826

827

828 **Table 2.** Measurements of four seasons from 2012 to 2016

|      | Spring_            | Summer_            | Autumn_            | Winter_                | Plant growing season                                                                      | Plant non-growing season                                                                                             |
|------|--------------------|--------------------|--------------------|------------------------|-------------------------------------------------------------------------------------------|----------------------------------------------------------------------------------------------------------------------|
|      | Period; Total days | Period; Total days | Period; Total days | Period; Total days     | Period; Total days                                                                        | Period; Total days                                                                                                   |
|      | Days               | Days               | Days               | Days                   | Days                                                                                      | Days                                                                                                                 |
| 2012 | 50 – 142; 93       | 143 – 229; 87      | 230 – 323; 94      | 1 – 49, 324 – 366; 92  | 139 – 286; 148 <sup>a</sup><br>122 – 305; 184 <sup>b</sup><br>143 – 290; 148 <sup>c</sup> | 1 – 138, 287 – 366; 218 <sup>a</sup><br>1 – 121, 306 – 366; 182 <sup>b</sup><br>1 – 142, 291 – 366; 218 <sup>c</sup> |
| 2013 | 36 – 137; 102      | 138 – 224; 87      | 225 – 334; 110     | 1 – 35, 335 – 365; 66  | 139 – 287; 149 <sup>a</sup><br>121 – 304; 184 <sup>b</sup><br>127 – 297; 171 <sup>c</sup> | 1 – 138, 288 – 365; 216 <sup>a</sup><br>1 – 120, 305 – 365; 181 <sup>b</sup><br>1 – 126, 298 – 365; 194 <sup>c</sup> |
| 2014 | 49 – 127; 79       | 128 – 228; 101     | 229 – 309; 81      | 1 – 48, 310 – 365; 104 | 137 – 288; 152 <sup>a</sup><br>121 – 304; 184 <sup>b</sup><br>142 – 294; 153 <sup>c</sup> | 1 – 136, 289 – 365; 213 <sup>a</sup><br>1 – 120, 305 – 365; 181 <sup>b</sup><br>1 – 141, 295 – 365; 212 <sup>c</sup> |
| 2015 | 36 – 150; 115      | 151 – 224; 74      | 225 – 312; 88      | 1 – 35, 313 – 365; 88  | 145 – 288; 144 <sup>a</sup><br>121 – 304; 184 <sup>b</sup><br>136 – 295; 160 <sup>c</sup> | 1 – 144, 289 – 365; 221 <sup>a</sup><br>1 – 120, 305 – 365; 181 <sup>b</sup><br>1 – 135, 296 – 365; 205 <sup>c</sup> |
| 2016 | 47 – 161; 115      | 162 – 225; 64      | 226 – 299; 74      | 1 – 46, 300 – 366; 113 | 141 – 287; 147 <sup>a</sup><br>122 – 305; 183 <sup>b</sup><br>140 – 296; 157 <sup>c</sup> | 1 – 140, 288 – 366; 219 <sup>a</sup><br>1 – 120, 305 – 366; 182 <sup>b</sup><br>1 – 139, 297 – 366; 209 <sup>c</sup> |

829 **Note:** <sup>a</sup>, based on vegetation cover and temperature change (VCT) (Lund et al., 2010; Tang and Arnone, 2013; Song et al., 2015); <sup>b</sup>, based on Julian  
830 months (JMC) (Da et al., 2015); <sup>c</sup>, based on vegetation phenology change (VPC). Spring\_, Summer\_, Autumn\_, Winter\_ are based on parameters of  
831 microbial activities, ALT variety coefficient and Tsoil (SMT).

832

833

834

835

836

837

838

839

840

841

842

843



**Table 3.** Correlation coefficients between CH<sub>4</sub> fluxes and environment factors on half-hour scales

| Environment<br>Factors | CH <sub>4</sub> Flux |       |         |       |                   |       |         |       |             |       |
|------------------------|----------------------|-------|---------|-------|-------------------|-------|---------|-------|-------------|-------|
|                        | Spring_              |       | Summer_ |       | Fall_             |       | Winter_ |       | 2012 – 2016 |       |
|                        | r                    | n     | r       | n     | r                 | n     | r       | n     | r           | n     |
| T <sub>air</sub>       | 0.25**               | 24144 | 0.14**  | 19818 | -0.16**           | 20959 | 0.32**  | 22224 | -0.11**     | 87145 |
| Wind Speed             | 0.31**               | 24144 | -0.04** | 19817 | -0.20**           | 20959 | 0.32**  | 22224 | 0.15**      | 87144 |
| VPD                    | -0.33**              | 18624 | -0.21** | 19263 | -0.09**           | 16737 | -0.21   | 18000 | 0.26**      | 69624 |
| Rn                     | 0.55**               | 24143 | 0.09**  | 19807 | -0.33**           | 20913 | 0.51**  | 22224 | 0.09**      | 87087 |
| Albedo                 | 0.07**               | 24144 | -0.01   | 19814 | -0.08**           | 20913 | 0.10**  | 22224 | 0.02**      | 87095 |
| SHF of 5cm             | 0.46**               | 24144 | -0.08** | 19818 | -0.23**           | 20913 | 0.43**  | 22224 | 0.09**      | 87099 |
| SHF of 15cm            | 0.36**               | 24144 | -0.15** | 19815 | -0.23**           | 20913 | 0.33**  | 22224 | 0.08**      | 87096 |
| SWC of 10cm            | -0.16**              | 24144 | -0.14** | 19818 | -0.06**           | 20959 | 0.00    | 22224 | -0.25**     | 87145 |
| SWC of 20cm            | -0.15**              | 24144 | -0.13** | 19816 | -0.07**           | 20959 | 0.11**  | 22224 | -0.24**     | 87143 |
| SWC of 40cm            | -0.11**              | 24144 | -0.02** | 19818 | 0.07**            | 20959 | 0.06**  | 22224 | -0.17**     | 87145 |
| SWC of 80cm            |                      |       | -0.13** | 19818 | 0.06**            | 20959 |         |       |             |       |
| SWC of 160cm           |                      |       | 0.04**  | 19818 | -0.11**           | 20959 |         |       |             |       |
| Precipitation          |                      |       | -0.02   | 16748 | 0.01 <sup>b</sup> | 17888 |         |       |             |       |
| ALT                    | 0.73**               | 23004 | 0.23**  | 19823 | 0.73**            | 21454 |         |       | 0.43**      | 64281 |

|                             |                     |       |                    |       |                     |       |                    |       |                     |       |
|-----------------------------|---------------------|-------|--------------------|-------|---------------------|-------|--------------------|-------|---------------------|-------|
| $\Delta I$                  | 0.77 <sup>**</sup>  | 100   | 0.57 <sup>**</sup> | 83    | 0.46 <sup>**</sup>  | 89    | 0.23               | 93    | 0.49 <sup>**</sup>  | 365   |
| $\Delta II$                 | 0.31 <sup>**</sup>  | 100   | 0.66 <sup>**</sup> | 83    | 0.78 <sup>**</sup>  | 89    | 0.19               | 93    | 0.52 <sup>**</sup>  | 365   |
| T <sub>soil</sub> of 0 cm   | -0.06 <sup>*</sup>  | 23004 | 0.13 <sup>**</sup> | 19823 | 0.07 <sup>**</sup>  | 20366 | 0.13 <sup>**</sup> | 21711 | 0.11 <sup>**</sup>  | 84904 |
| T <sub>soil</sub> of 5 cm   | 0.15 <sup>**</sup>  | 24144 | 0.15 <sup>**</sup> | 19808 | -0.13 <sup>**</sup> | 21454 | 0.27 <sup>**</sup> | 22224 | 0.24 <sup>**</sup>  | 87630 |
| T <sub>soil</sub> of 10 cm  | -0.03 <sup>**</sup> | 24144 | 0.12 <sup>**</sup> | 19808 | 0.08 <sup>**</sup>  | 21454 | 0.16 <sup>**</sup> | 22224 | 0.13 <sup>**</sup>  | 87630 |
| T <sub>soil</sub> of 20 cm  | -0.14 <sup>**</sup> | 24144 | 0.08 <sup>**</sup> | 19808 | 0.02 <sup>**</sup>  | 21454 | 0.06 <sup>**</sup> | 22224 | -0.09 <sup>**</sup> | 87630 |
| T <sub>soil</sub> of 30 cm  | -0.13 <sup>**</sup> | 23004 | 0.06 <sup>**</sup> | 19823 | -0.02 <sup>**</sup> | 20366 | 0.07 <sup>**</sup> | 21711 | -0.08 <sup>**</sup> | 84904 |
| T <sub>soil</sub> of 40 cm  | 0.14 <sup>**</sup>  | 24144 | 0.05 <sup>**</sup> | 19808 | -0.01 <sup>b</sup>  | 21454 | 0.06 <sup>**</sup> | 22224 | 0.11 <sup>**</sup>  | 87630 |
| T <sub>soil</sub> of 50 cm  |                     |       | 0.04 <sup>**</sup> | 19823 | -0.05 <sup>**</sup> | 20366 |                    |       |                     |       |
| T <sub>soil</sub> of 70 cm  |                     |       | 0.07 <sup>**</sup> | 19823 | -0.05 <sup>**</sup> | 20366 |                    |       |                     |       |
| T <sub>soil</sub> of 80 cm  |                     |       | 0.05 <sup>**</sup> | 19808 | 0.04 <sup>**</sup>  | 21454 |                    |       |                     |       |
| T <sub>soil</sub> of 100 cm |                     |       | 0.10 <sup>**</sup> | 19823 | -0.05 <sup>**</sup> | 21454 |                    |       |                     |       |
| T <sub>soil</sub> of 150 cm |                     |       | 0.09 <sup>**</sup> | 19823 | -0.04 <sup>**</sup> | 20366 |                    |       |                     |       |
| T <sub>soil</sub> of 160 cm |                     |       | 0.10 <sup>**</sup> | 19808 | 0.01 <sup>**</sup>  | 21454 |                    |       |                     |       |
| T <sub>soil</sub> of 200 cm |                     |       | 0.02 <sup>**</sup> | 19823 | -0.02 <sup>**</sup> | 20366 |                    |       |                     |       |

845 **Note:** <sup>\*\*</sup> means  $p < 0.01$ , <sup>\*</sup> means  $p < 0.05$ ; r values for the relationship between CH<sub>4</sub> flux and environment factors. T<sub>air</sub> means air temperature of 3 m  
846 above the ground surface. VPD is vapor pressure deficit, NR is net radiation, and SWC is soil water content, ALT is active layer thickness, which fitted  
847 through the depth of soil 0 °C in Surfer 8.0., and the data is removed as meaningless in winter. T<sub>soil</sub> is the temperature of the soil. In spring\_ and

winter\_, precipitation data is too sparse for statistical analysis.  $\Delta I$  is the soil 0 – 25cm archaeal methanogens gene expression, and  $\Delta II$  is the soil 0 – 25 cm methanotrophic gene expression. The coefficients (r) between CH<sub>4</sub> flux and  $\Delta I$ ,  $\Delta II$  are obtained using the synchronous CH<sub>4</sub> fluxes averaged for 5 days.

862 **Table 4.** Principal components analysis (PCA) of the environmental factors.

| Component            | Spring_ |       |       |       | Summer_ |       |       |       | autumn_ |       |       |       | Winter_ |       |       |       |
|----------------------|---------|-------|-------|-------|---------|-------|-------|-------|---------|-------|-------|-------|---------|-------|-------|-------|
|                      | PC1     | PC2   | PC3   | PC4   | PC1     | PC2   | PC3   | PC4   | PC1     | PC2   | PC3   | PC4   | PC1     | PC2   | PC3   | PC4   |
| wind speed           | -0.03   | 0.51  | 0.65  | -0.46 | 0.02    | 0.37  | 0.38  | -0.13 | -0.04   | 0.44  | 0.59  | 0.67  | 0.27    | 0.45  | -0.11 | -0.27 |
| Tair                 | 0.38    | 0.29  | -0.05 | -0.11 | 0.42    | 0.22  | -0.03 | 0.02  | 0.36    | 0.21  | 0.08  | -0.06 | 0.48    | 0.12  | -0.02 | 0.01  |
| VPD                  | 0.34    | -0.27 | 0.40  | 0.15  | 0.17    | 0.46  | -0.22 | 0.09  | 0.34    | -0.15 | 0.17  | -0.07 | 0.14    | -0.15 | 0.95  | -0.22 |
| Rn                   | 0.16    | 0.49  | 0.00  | 0.76  | -0.01   | 0.07  | 0.58  | 0.11  | 0.12    | 0.54  | -0.43 | -0.07 | 0.26    | 0.47  | -0.01 | -0.49 |
| SHF of 15cm          | 0.24    | 0.49  | -0.30 | -0.09 | 0.25    | 0.53  | -0.09 | 0.01  | 0.15    | 0.59  | -0.23 | -0.15 | 0.36    | 0.37  | 0.14  | 0.58  |
| ALT                  | 0.22    | -0.40 | 0.40  | 0.27  | 0.32    | -0.53 | -0.05 | 0.02  | 0.29    | 0.49  | 0.70  | 0.25  |         |       |       |       |
| $\Delta I$           | 0.49    | -0.22 | 0.01  | -0.08 | 0.50    | -0.16 | 0.02  | -0.16 | 0.29    | 0.31  | 0.24  | -0.51 | 0.52    | 0.05  | 0.07  | -0.03 |
| SWC of 10 – 20cm     |         |       |       |       |         |       |       |       |         |       |       |       | -0.31   | 0.45  | 0.22  | 0.47  |
| SWC of 10 – 40cm     | 0.33    | -0.20 | 0.50  | 0.25  | -0.16   | 0.15  | -0.16 | 0.73  | 0.28    | -0.18 | -0.41 | 0.53  |         |       |       |       |
| SWC of 50 – 160cm    |         |       |       |       | 0.23    | -0.20 | -0.16 | 0.55  | 0.31    | -0.17 | -0.32 | 0.41  |         |       |       |       |
| Precipitation        |         |       |       |       | 0.03    | -0.04 | 0.63  | 0.35  |         |       |       |       |         |       |       |       |
| Tsoil of 0 cm        | 0.43    | -0.07 | -0.20 | -0.27 | 0.43    | 0.08  | 0.08  | -0.07 | 0.37    | 0.07  | 0.19  | -0.16 | 0.43    | -0.35 | -0.15 | 0.09  |
| Tsoil of 5 – 20 cm   | 0.44    | -0.01 | -0.17 | -0.16 |         |       |       |       |         |       |       |       | 0.45    | -0.28 | 0.00  | 0.28  |
| Tsoil of 5 – 40 cm   |         |       |       |       | 0.46    | -0.05 | 0.04  | -0.03 | 0.38    | 0.02  | 0.18  | -0.17 |         |       |       |       |
| Tsoil of 30 – 50cm   | 0.40    | -0.23 | -0.08 | -0.04 |         |       |       |       |         |       |       |       |         |       |       |       |
| Tsoil of 50 – 80cm   |         |       |       |       | 0.37    | -0.36 | 0.00  | 0.01  | 0.37    | -0.11 | 0.19  | -0.14 |         |       |       |       |
| Tsoil of 100 – 200cm |         |       |       |       | 0.33    | -0.34 | 0.01  | -0.01 | 0.36    | -0.14 | 0.08  | 0.00  |         |       |       |       |
| Percent of variance  | 0.63    | 0.23  | 0.08  | 0.04  | 0.70    | 0.18  | 0.07  | 0.02  | 0.69    | 0.17  | 0.08  | 0.04  | 0.75    | 0.21  | 0.02  | 0.01  |
| Cumulative           | 0.63    | 0.86  | 0.94  | 0.98  | 0.70    | 0.88  | 0.95  | 0.97  | 0.69    | 0.86  | 0.94  | 0.98  | 0.75    | 0.96  | 0.98  | 0.99  |

863 **Note:** PC means principal component. Before PCA, SWC was divided for three parts, 10 – 20 cm, 10 – 40 cm, and 50 – 160 cm according to collinearity  
864 test in four seasons. Tsoil was divided for six parts of Tsoil of 0 cm, Tsoil of 5 – 20 cm, Tsoil of 5 – 40 cm, Tsoil of 30 – 50 cm, Tsoil of 50 – 80 cm,  
865 and Tsoil of 60 – 200 cm according to collinearity test in different seasons.

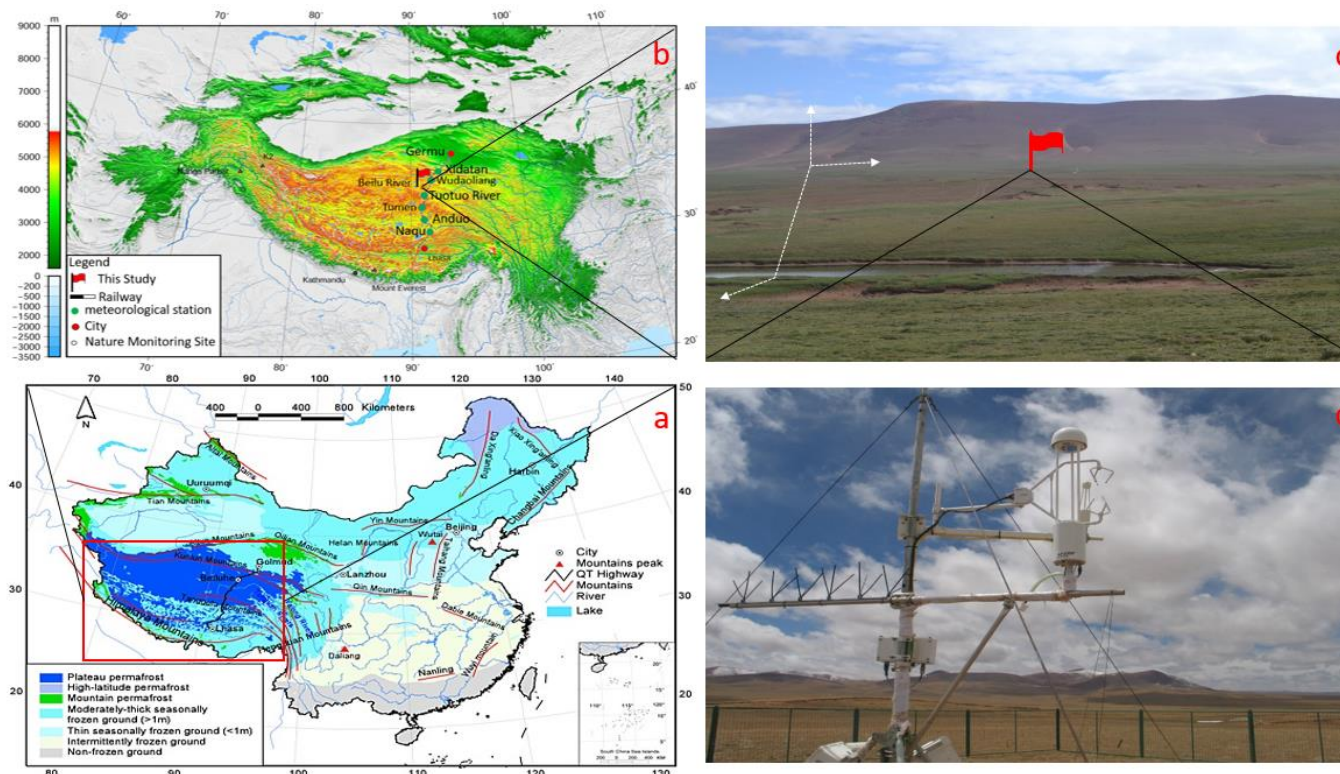

**Figure 1.** Geographic location of the study site: (a) is a map of China's permafrost distribution, and the red box marks the approximate location of the Qinghai–Tibet Plateau; (b) shows the study site location and meteorological stations along the Qinghai–Tibet railway; (c) is the photo showing the study site's topography and physiognomic. The small red flag in (c) is the eddy covariance tower location; (d) is the close-up shot of the LI–7700 for methane measurement. *Map boundary and location are approximate. Geographic features and the names do not imply any official endorsement or recognition*

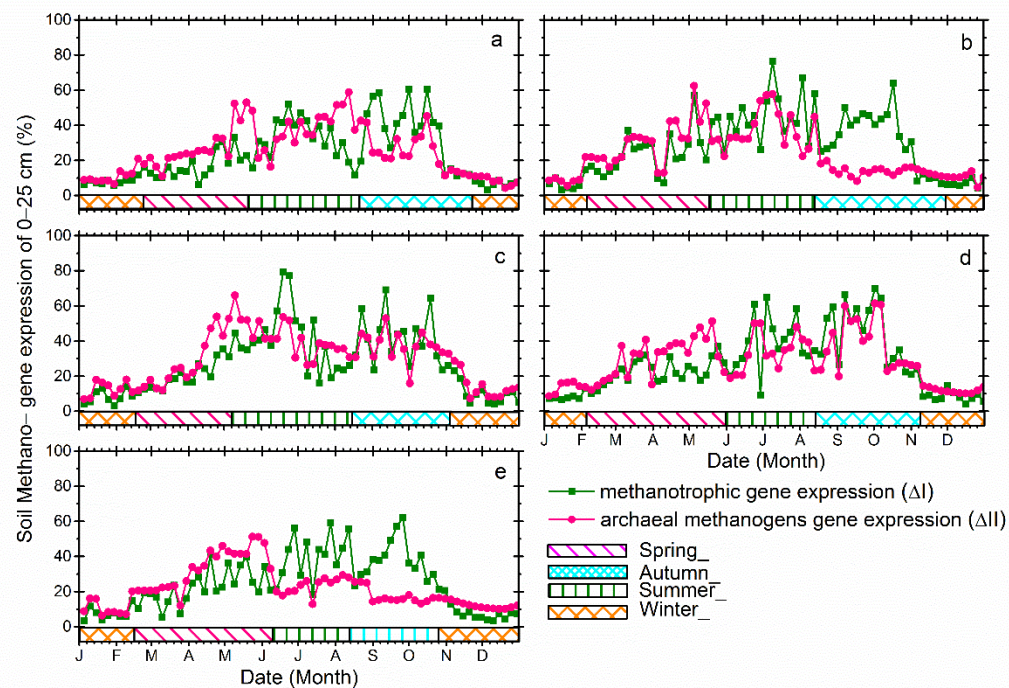

**Figure 2.** Annual patterns of soil methanogen–gene expression of 0 – 25 cm soil depth for years: (a) 2012, (b) 2013, (c) 2014, (d) 2015, and (e) 2016.



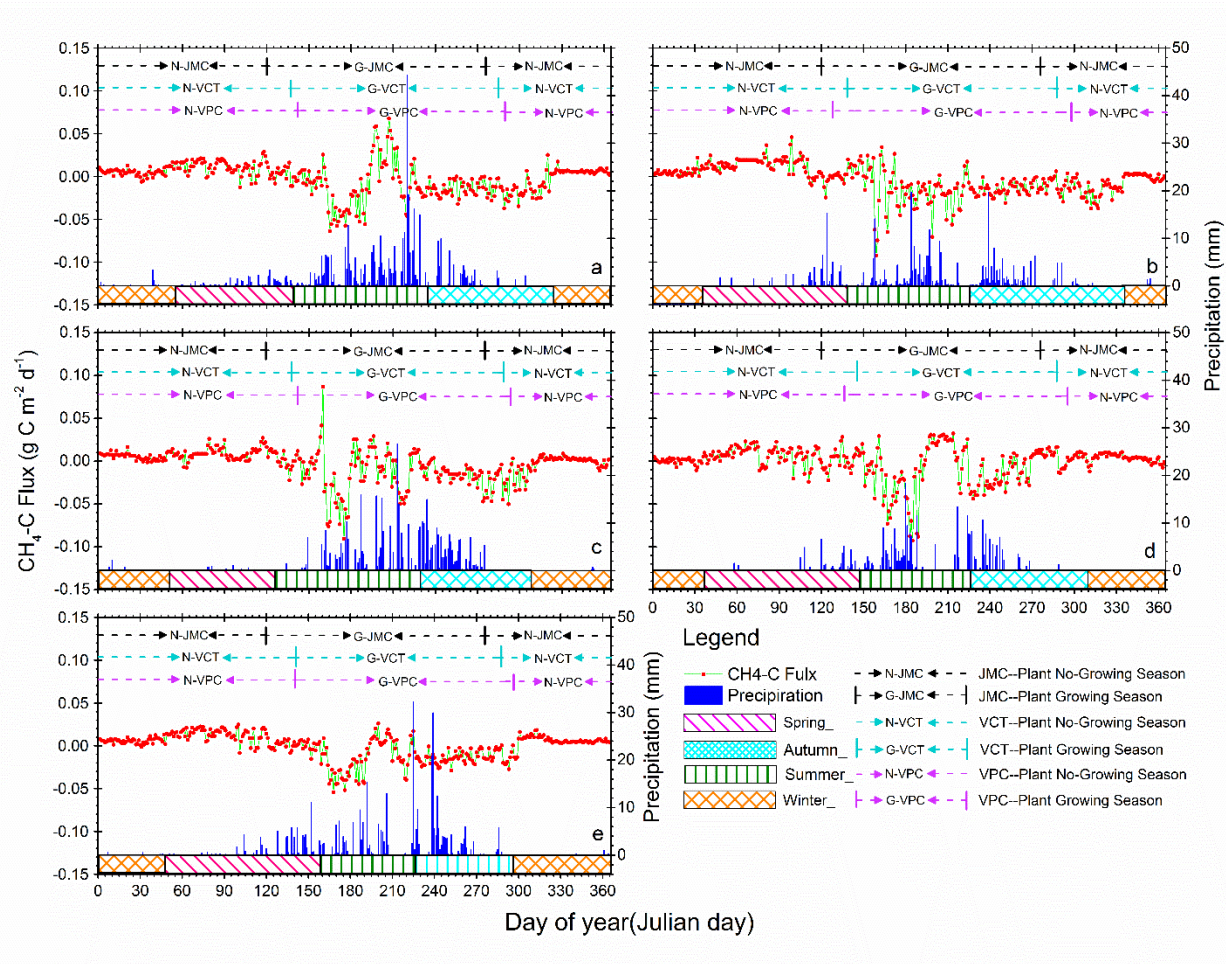

**Figure 3.** Annual patterns of diel methane ( $\text{CH}_4$ ) flux and precipitation variations from 2012 to 2016. Positive values indicate  $\text{CH}_4$  release and negative values indicate  $\text{CH}_4$  uptake by ecosystems. Red dots and light green lines are  $\text{CH}_4\text{-C}$  flux variation, and the deep blue histograms show diel precipitation accumulation. Pink, olive, cyan, and orange blocks mean spring, summer, autumn, and winter seasons respectively, according to our new method of SMT (see Methods), . Black, cyan, and pink dotted lines with bars separated the plant growing from non-growing seasons and stand for seasons by the method JMC, VCT, and VPC, respectively. Details about the methods JMC, VCT, and VPC can be found in Text part 3.2.

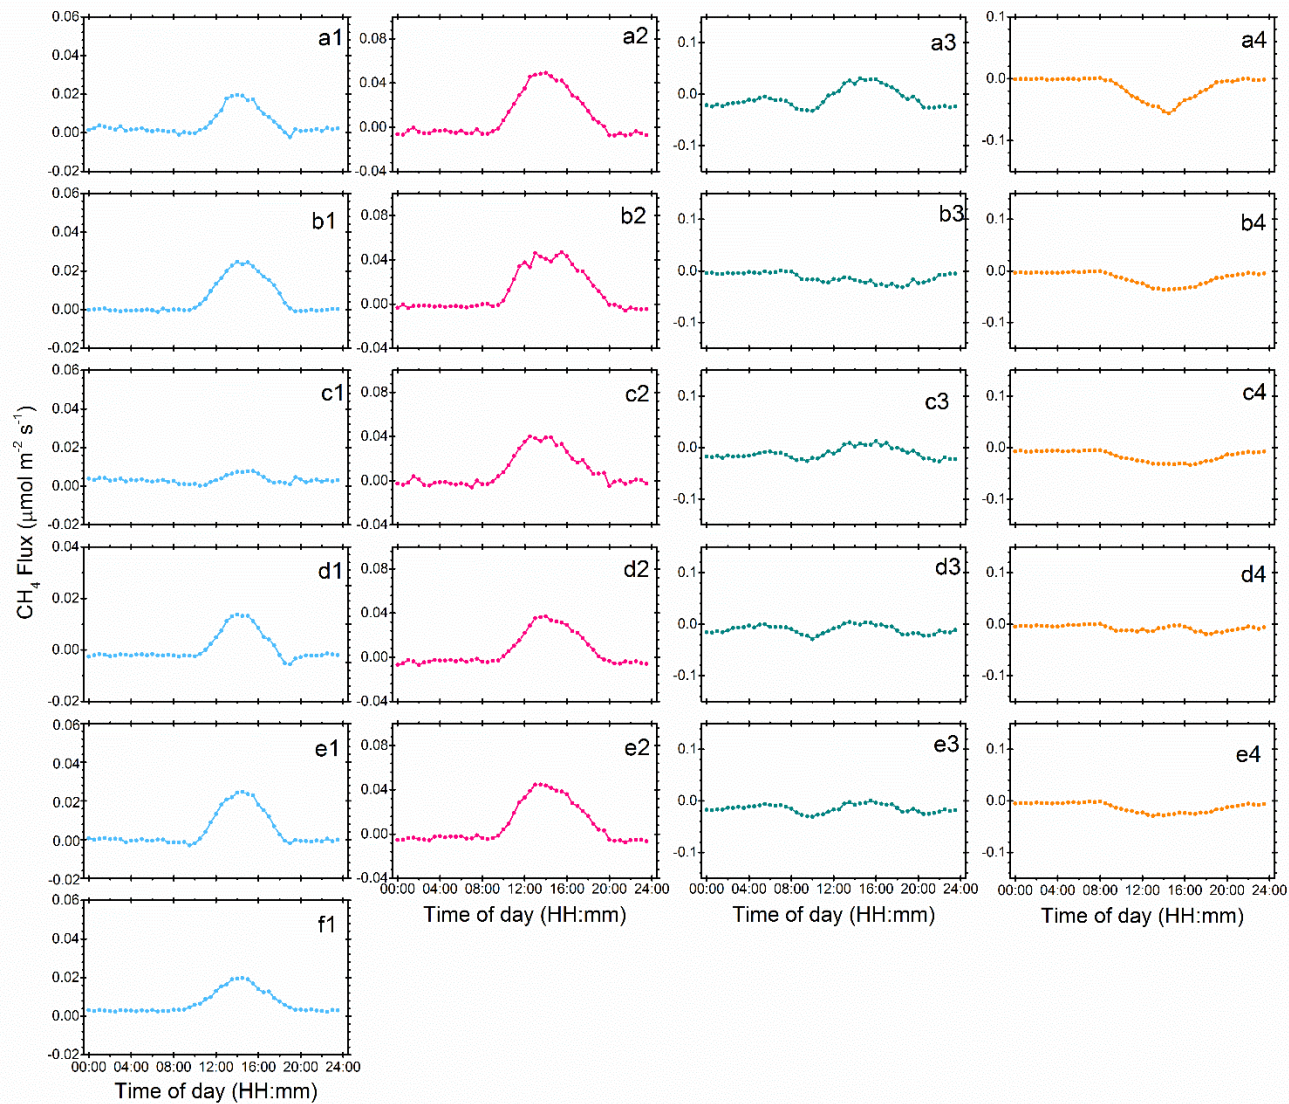

**Figure 4.** Diel CH<sub>4</sub> fluxes from 2012 to 2016 for different seasons. Blue, pink, green and orange, represent winter, spring, summer, and autumn, respectively; (a1), (a2), (a3), and (a4) are for 2012; (b1), (b2), (b3), and (b4) are for 2013; (c1), (c2), (c3) and (c4) are for 2014; (d1), (d2), (d3), and (d4) are for 2015; (e1), (e2), (e3), (e4) and (f1) are for 2016.



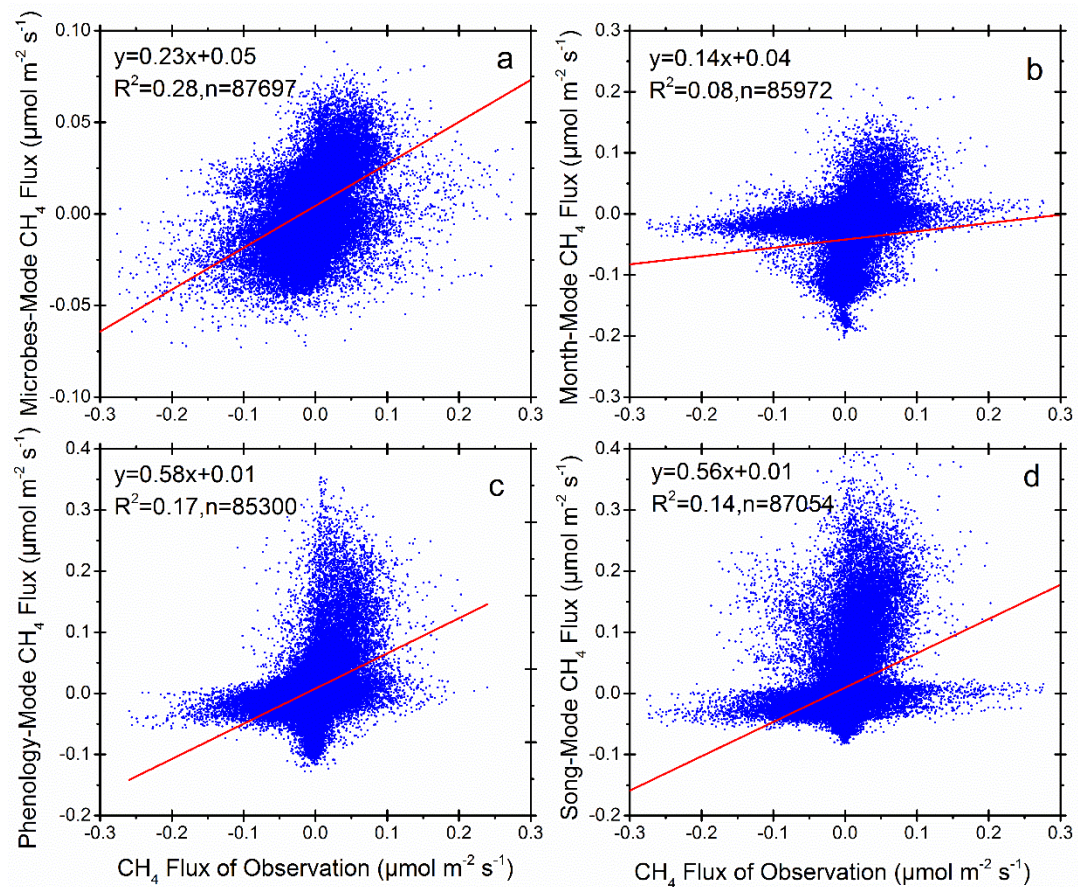

**Figure 5.** Regression comparison between observation and modeled methane fluxes with four different seasonal definitions and classification models. Panels (a), (b), (c), and (d) are for the SMT, JMC, VCT, and VPC methods, respectively.

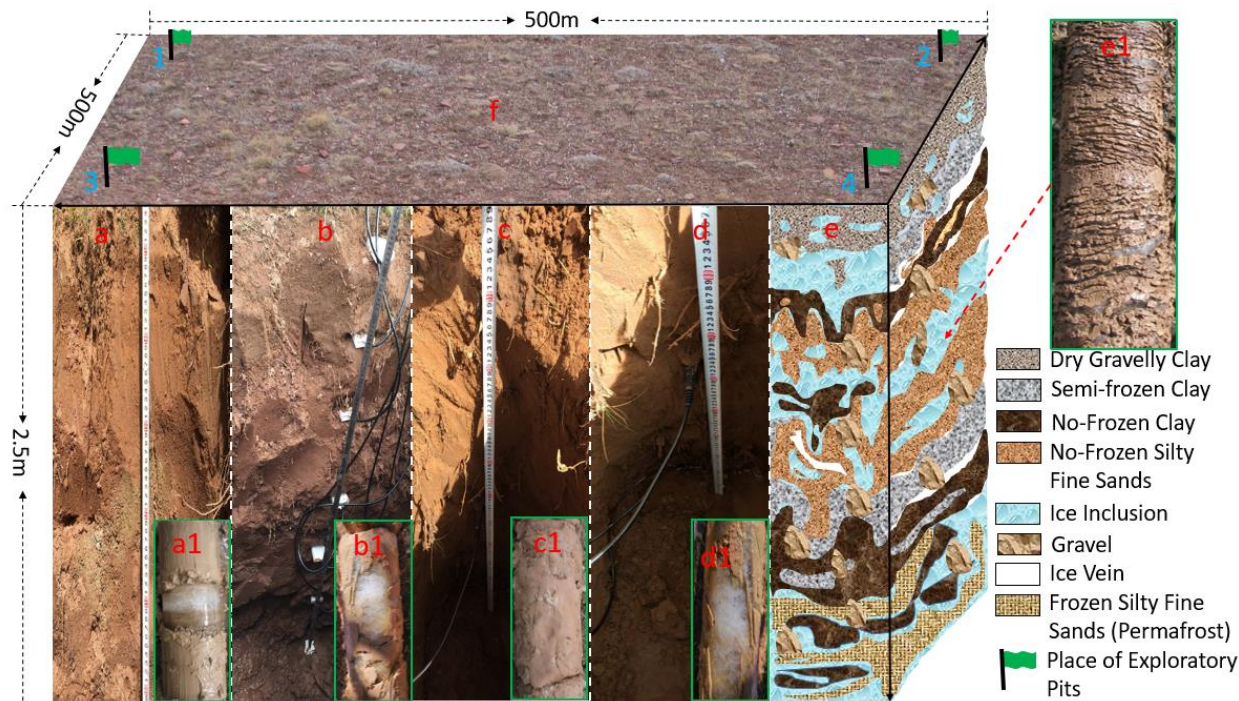

**Figure 6.** Location of exploratory pits and drillings in this study in autumn: (f) is photo of a typical ground surface (October 16th, 2014). Green flags represent the location for the soil survey by test pitting and drilling. (a), (b), (c), and (d) are test pitting sections for active layer 0 – 250 cm depths soil water content and temperature measured in eddy covariance North (1), South (2), East (3), and West (4) corners, respectively. (a1), (b1), (c1), and (d1) are drilling cores, with clear ice (white) in (a1), (b1), and (d1), but not in (c1); (e) provides an illustration that combines results from drillings, test pitting and multi-channel ground-penetrating radar (Malå Geoscience, Sweden) for active layer variations in permafrost area during the autumn season; and (e1) is a core sample of the same drilling (October 16<sup>th</sup>, 2014).

911 **Supplementary Table 1** Seasonal soil water content (SWC, %) of winter\_, spring\_, summer\_, and autumn\_ from 2012 to 2016.

| Seasonal                    | Period     | 10 cm | 20 cm | 40 cm | 80cm | 160cm |
|-----------------------------|------------|-------|-------|-------|------|-------|
| Soil Water Content (SWC), % |            |       |       |       |      |       |
| Winter_                     | 2012 early | 0.11  | 0.08  | 0.07  | 0.11 | 0.14  |
|                             | 2012-2013  | 0.10  | 0.08  | 0.07  | 0.11 | 0.16  |
|                             | 2013-2014  | 0.10  | 0.08  | 0.07  | 0.11 | 0.13  |
|                             | 2014-2015  | 0.10  | 0.08  | 0.07  | 0.11 | 0.17  |
|                             | 2015-2016  | 0.10  | 0.08  | 0.07  | 0.11 | 0.16  |
|                             | 2016 later | 0.10  | 0.08  | 0.07  | 0.12 | 0.19  |
|                             | Average    | 0.10  | 0.08  | 0.07  | 0.11 | 0.16  |
| Spring_                     | 2012       | 0.13  | 0.09  | 0.08  | 0.11 | 0.13  |
|                             | 2013       | 0.12  | 0.09  | 0.08  | 0.11 | 0.13  |
|                             | 2014       | 0.12  | 0.08  | 0.07  | 0.11 | 0.13  |
|                             | 2015       | 0.13  | 0.09  | 0.08  | 0.11 | 0.14  |
|                             | 2016       | 0.12  | 0.09  | 0.08  | 0.13 | 0.15  |
|                             | Average    | 0.12  | 0.08  | 0.08  | 0.11 | 0.14  |
| Summer_                     | 2012       | 0.18  | 0.11  | 0.10  | 0.17 | 0.27  |
|                             | 2013       | 0.16  | 0.11  | 0.11  | 0.19 | 0.25  |
|                             | 2014       | 0.16  | 0.10  | 0.10  | 0.16 | 0.24  |
|                             | 2015       | 0.16  | 0.10  | 0.10  | 0.19 | 0.28  |
|                             | 2016       | 0.16  | 0.10  | 0.09  | 0.18 | 0.28  |
|                             | Average    | 0.17  | 0.10  | 0.10  | 0.18 | 0.26  |
| Autumn_                     | 2012       | 0.14  | 0.09  | 0.08  | 0.14 | 0.21  |
|                             | 2013       | 0.14  | 0.09  | 0.09  | 0.15 | 0.20  |
|                             | 2014       | 0.16  | 0.10  | 0.10  | 0.16 | 0.22  |
|                             | 2015       | 0.15  | 0.10  | 0.09  | 0.15 | 0.21  |
|                             | 2016       | 0.16  | 0.10  | 0.09  | 0.16 | 0.21  |
|                             | Average    | 0.15  | 0.10  | 0.09  | 0.15 | 0.21  |

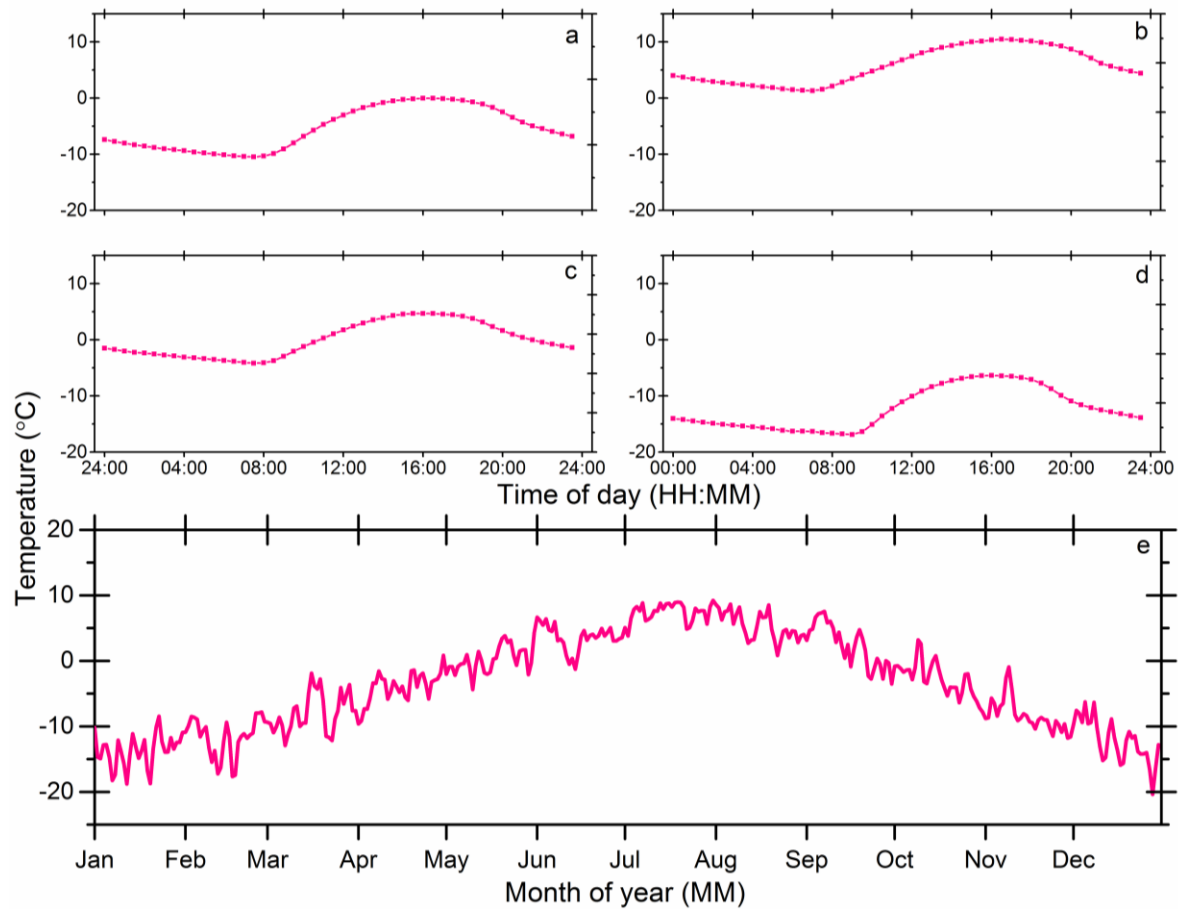

914

915 **Supplementary Figure 1.** Air temperature (T<sub>air</sub>) of 3 meters above the ground surface: (a), (b),  
 916 (c), and (d) are half-hour scale mean values in spring, summer, autumn, and winter, respectively;  
 917 (e) shows diel-scale mean values from 2012 to 2016.

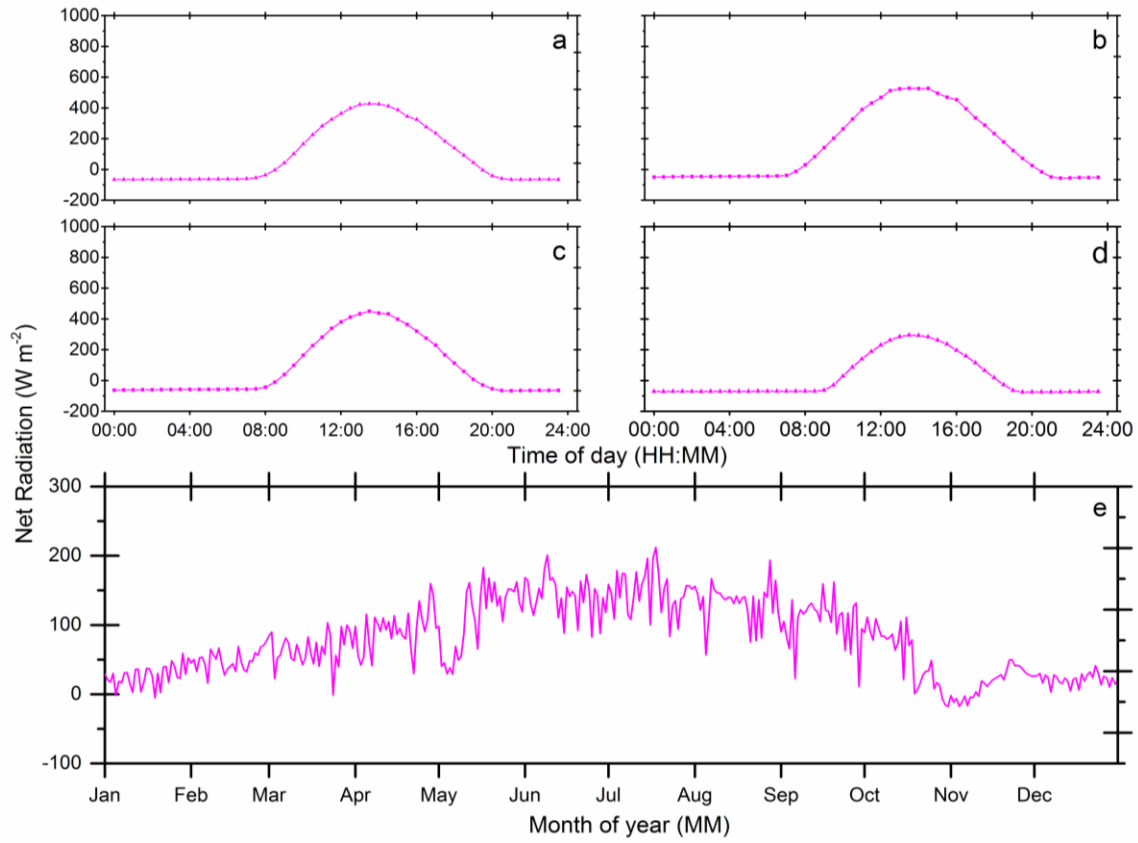

**Supplementary Figure 2.** Net radiation ( $R_n$ ) of 3 meters above the ground surface: (a), (b), (c), and (d) are half-hour scale mean values in spring, summer, autumn, and winter, respectively; (e) shows diel-scale mean values from 2012 to 2016.

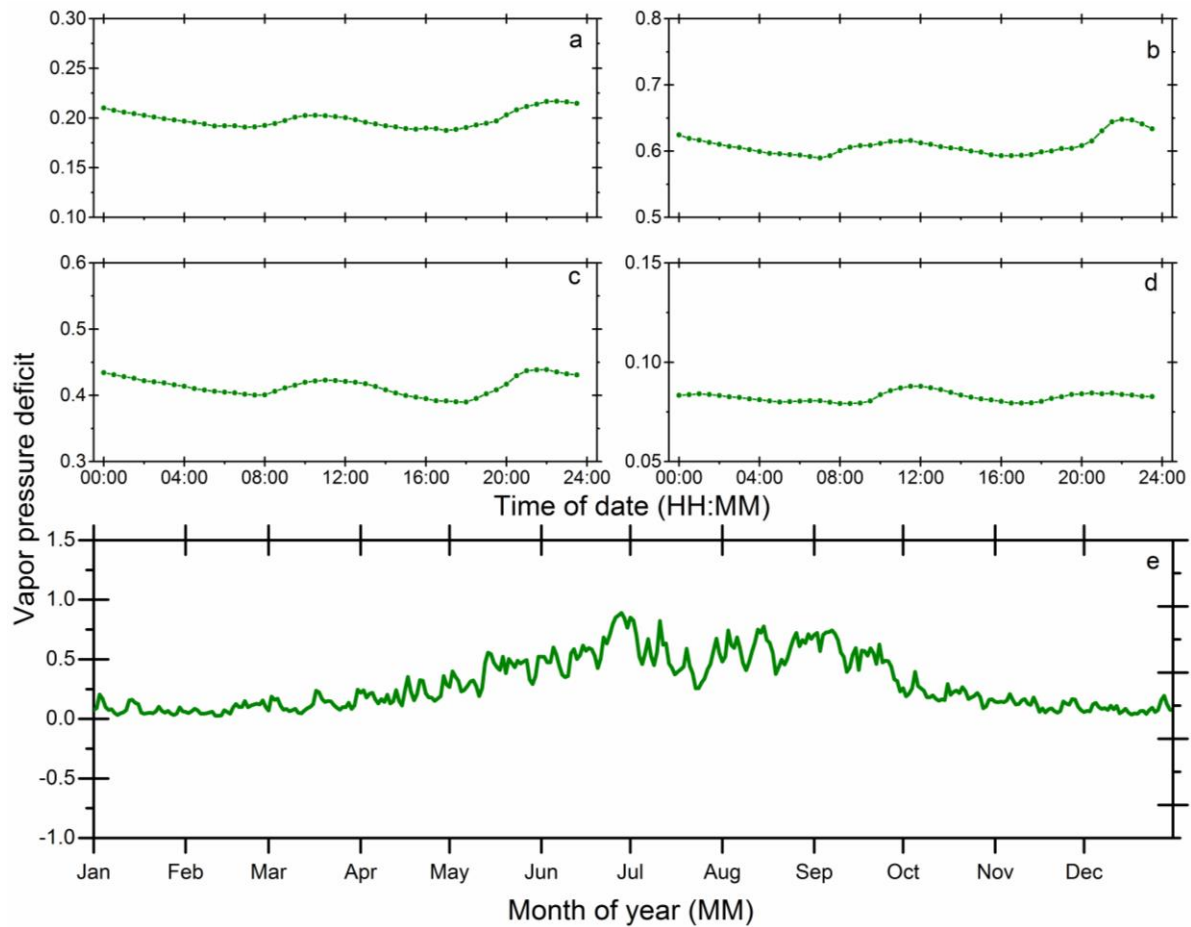

**Supplementary Figure 3.** Vapor pressure deficit (VPD) of 3 meters above the ground surface: (a), (b), (c), and (d) are half-hour scale mean values in spring, summer, autumn, and winter, respectively; (e) shows diel-scale mean values from 2012 to 2016.



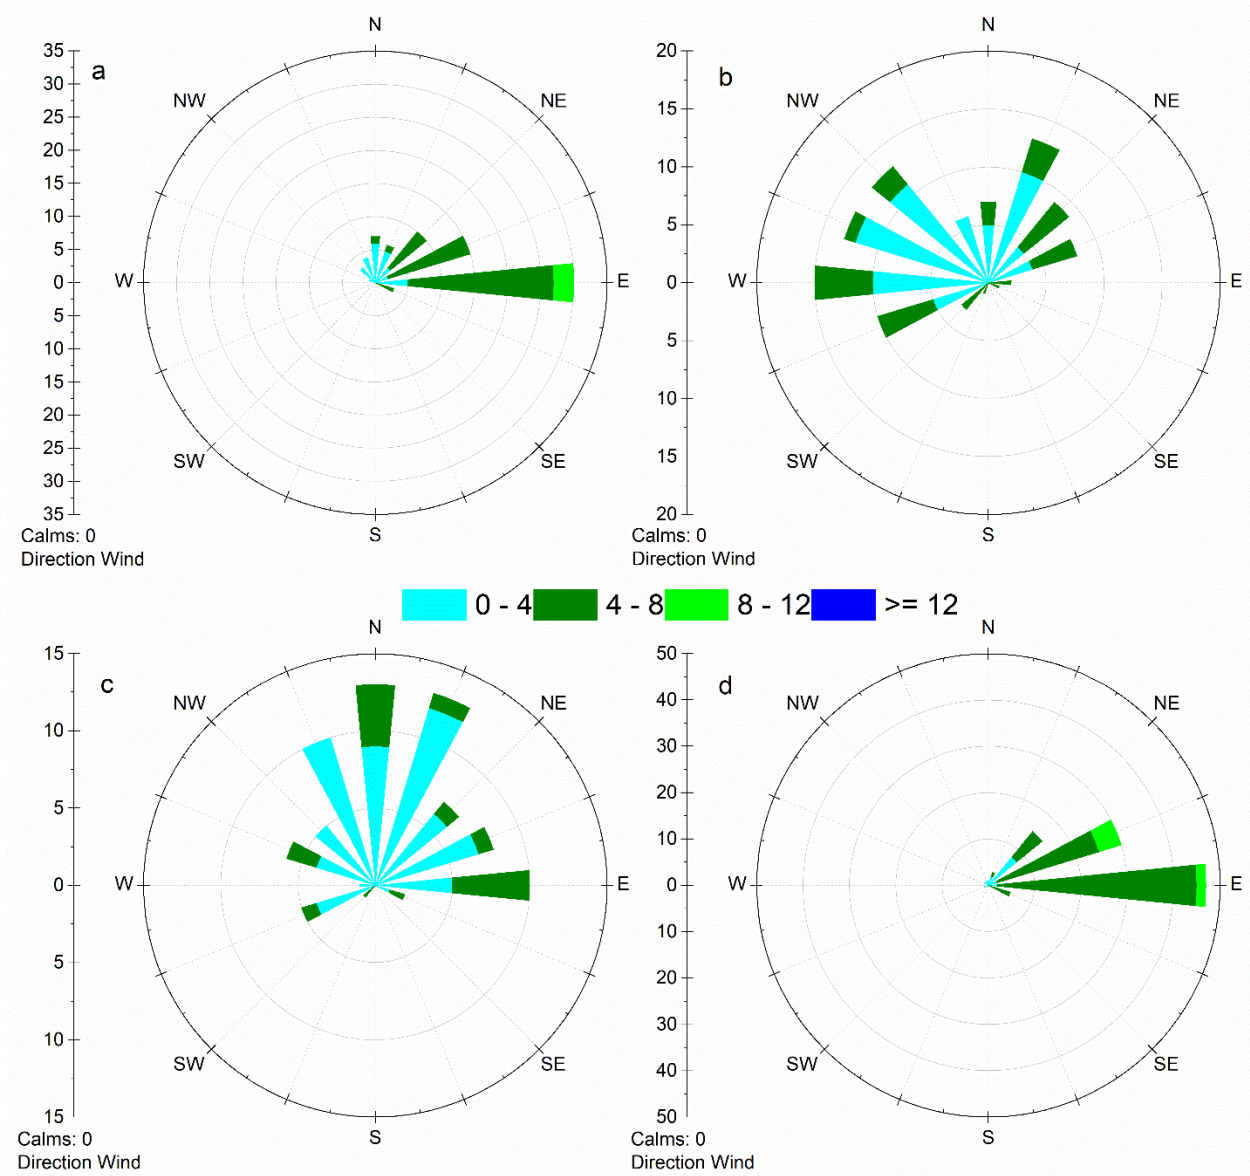

**Supplementary Figure 4.** Diel mean of wind speed and direction between 2012 and 2016. All data are presented as mean values with standard deviations (mean  $\pm$  standard deviation).

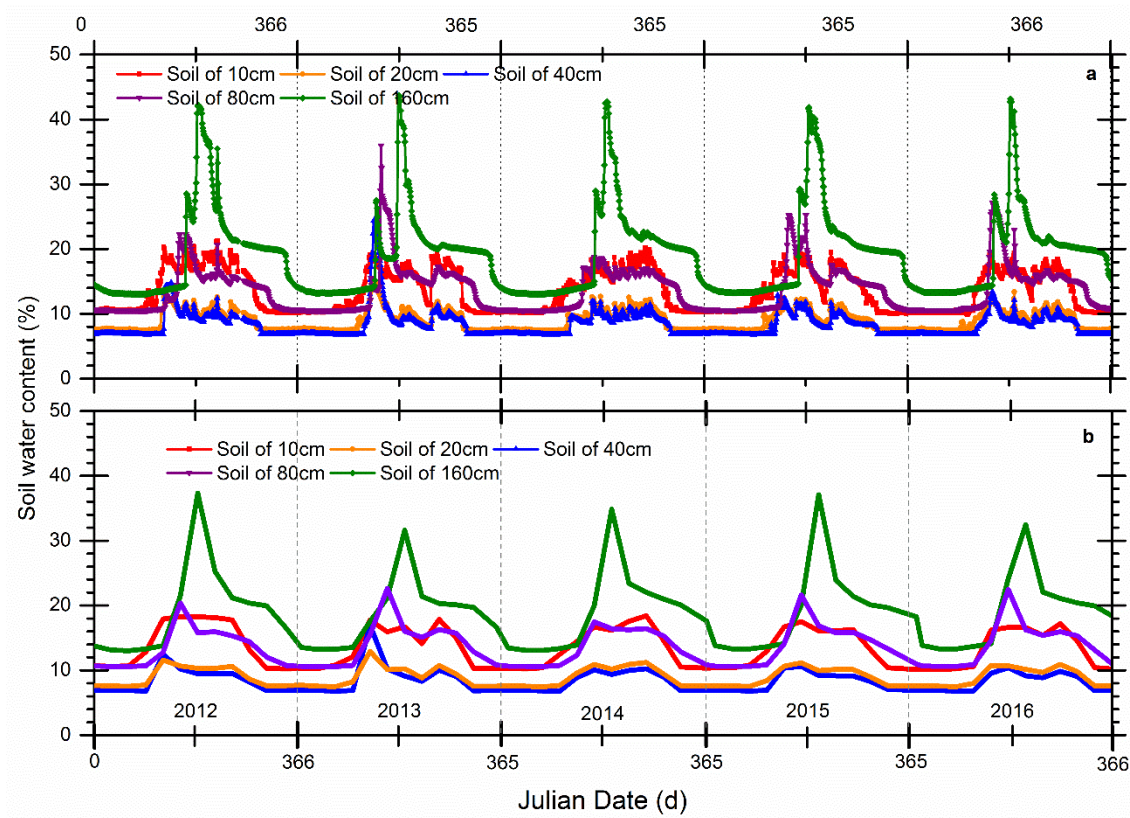

**Supplementary Figure 5.** Comparison between soil water content (SWC) of two different time resolutions from 2012 to 2016, (a) is the half-hour scale SWC at soil depths of 10 cm, 20 cm, 40 cm, 80 cm, and 160 cm; and (b) is the 4-hour mean SWC for the same depths.



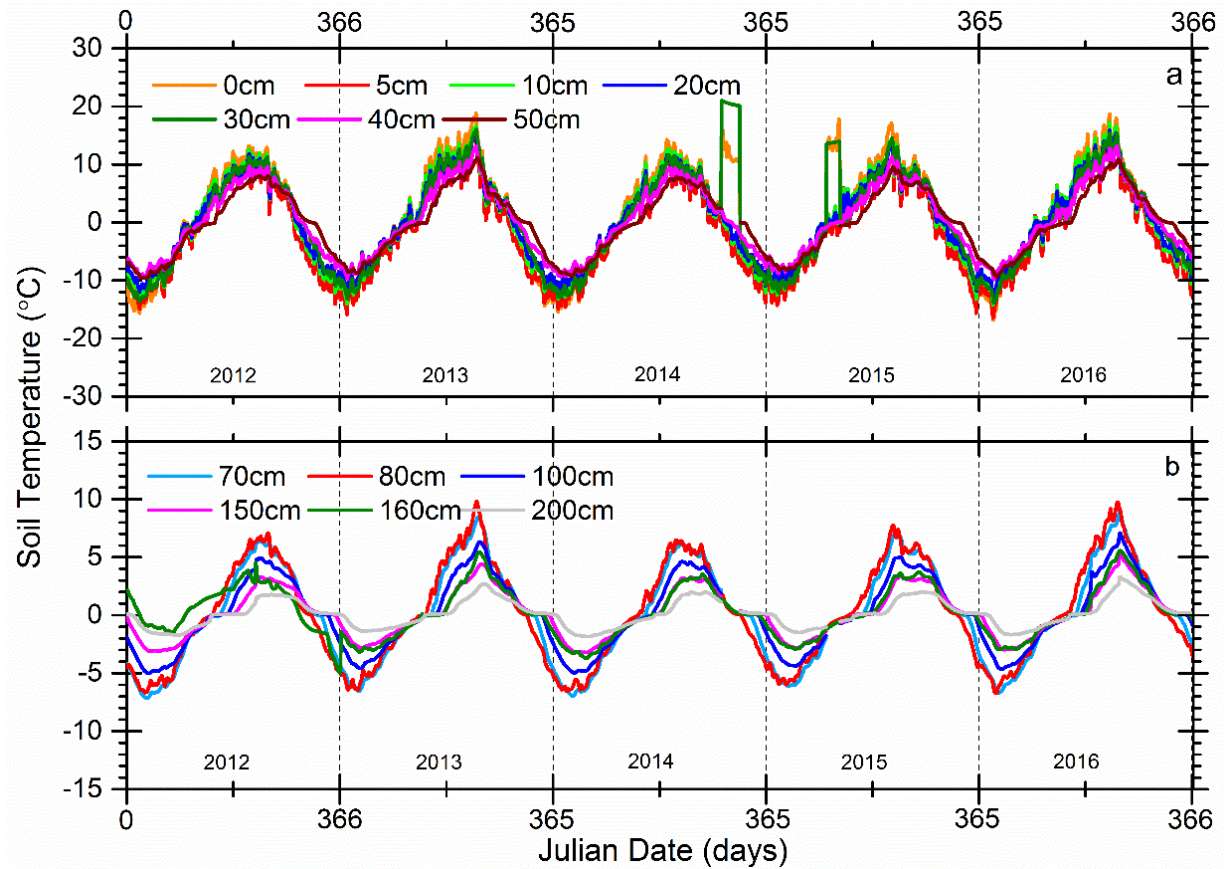

**Supplementary Figure 6.** Half-hour scale of 0 – 200 cm soil temperature ( $T_{soil}$ ) variations from 2012 to 2016, (a) is for soil depths of 0 cm, 5 cm, 10 cm, 20 cm, 30 cm, 40 cm, 50 cm, (b) is for soil depth of 70 cm, 80 cm, 100 cm, 150 cm, 160 cm, and 200 cm.

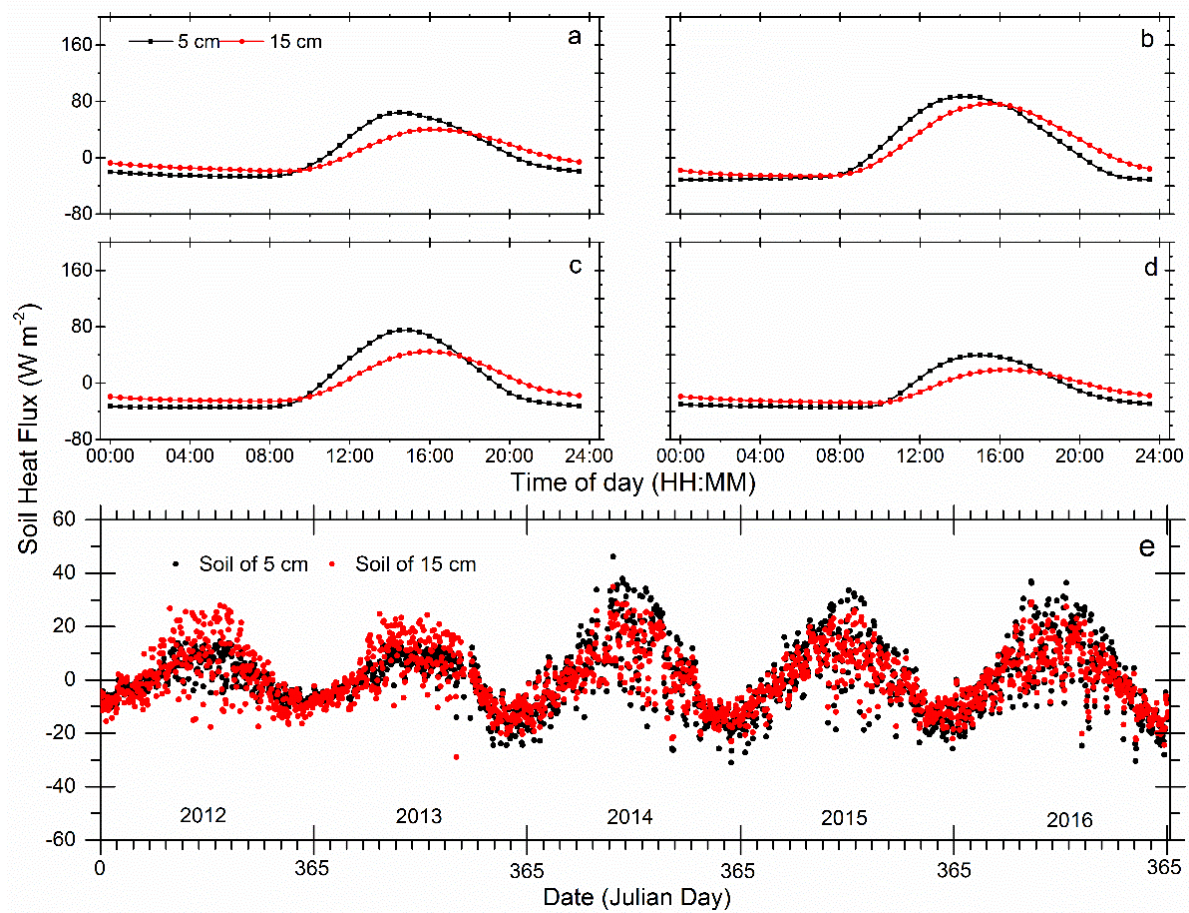

**Supplementary Figure 7.** Soil heat flux (SHF) at depth of 5 cm and 15 cm: (a), (b), (c), and (d) are half-hour scale mean values in spring, summer, autumn, and winter, respectively; (e) shows diel-scale mean values from 2012 to 2016.

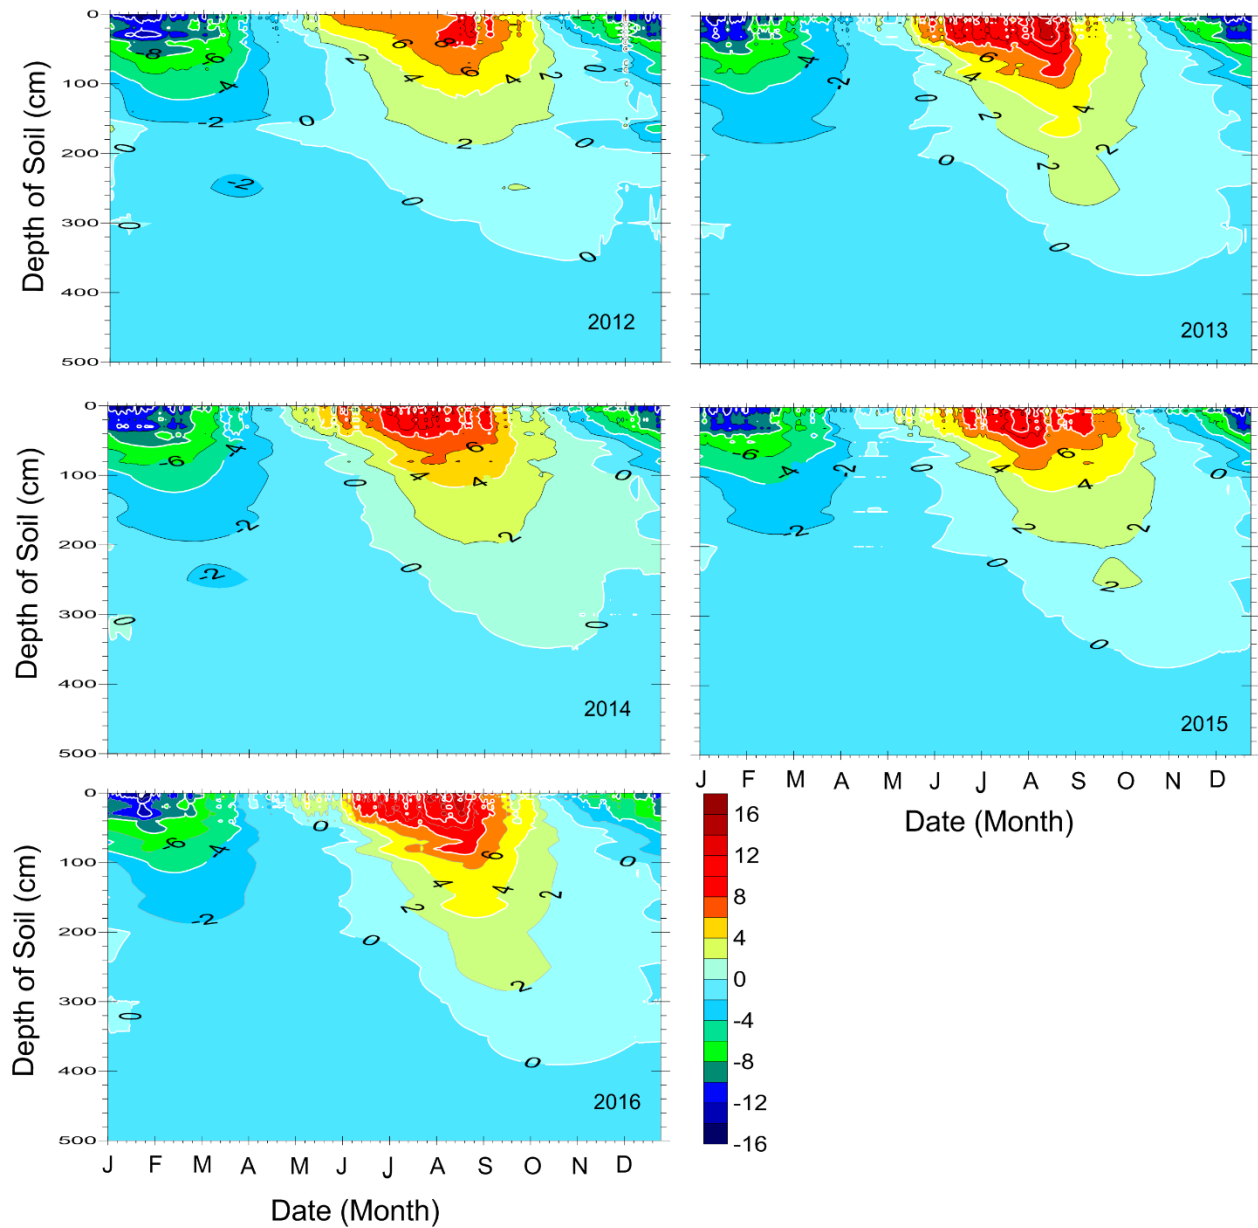

**Supplementary Figure 8.** Characteristics of the seasonal freezing and thawing processes of the active layer for years: 2012, 2013, 2014, 2015, and 2016. Different colors represent the soil temperature gradients from -16 °C to 20 °C. The depth of 0 °C represent the active layer thickness (ALT).

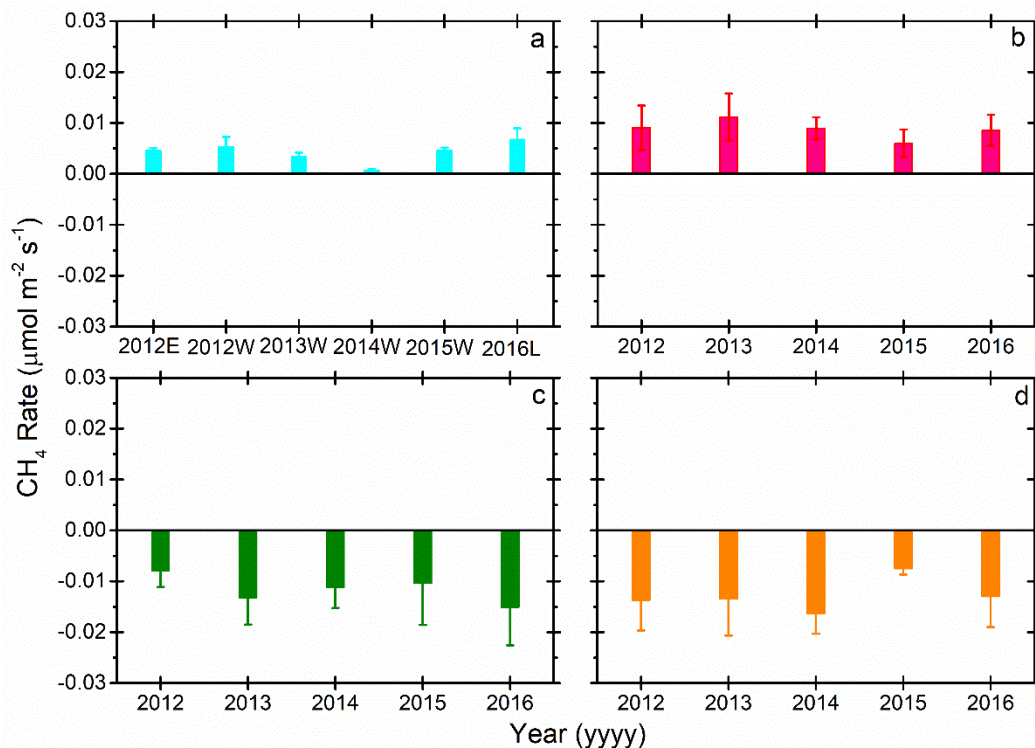

**Supplementary Figure 9.** Seasonal CH<sub>4</sub> rate mean value from 2012 to 2016: (a) is winter, (b) is spring, (c) is summer, and (d) is autumn. In the (a), 2012E is started from January 1<sup>st</sup>, 2012 and ended on February 17<sup>th</sup>, 2012; 2012W is started from 19<sup>th</sup> November, 2012 to 4<sup>th</sup> February, 2013; 2013W is started from 1<sup>st</sup> December, 2013 to 17<sup>th</sup> February, 2014; 2014W is started from 6<sup>th</sup> November, 2014 to 4<sup>th</sup> February, 2015; 2015W is started from 9<sup>th</sup> November, 2015 to 15<sup>th</sup> February, 2016; 2016L is started from October 26<sup>th</sup>, 2016 and ended on December 31<sup>st</sup>, 2016. All data are presented as mean values with standard deviations (mean ± standard deviation).



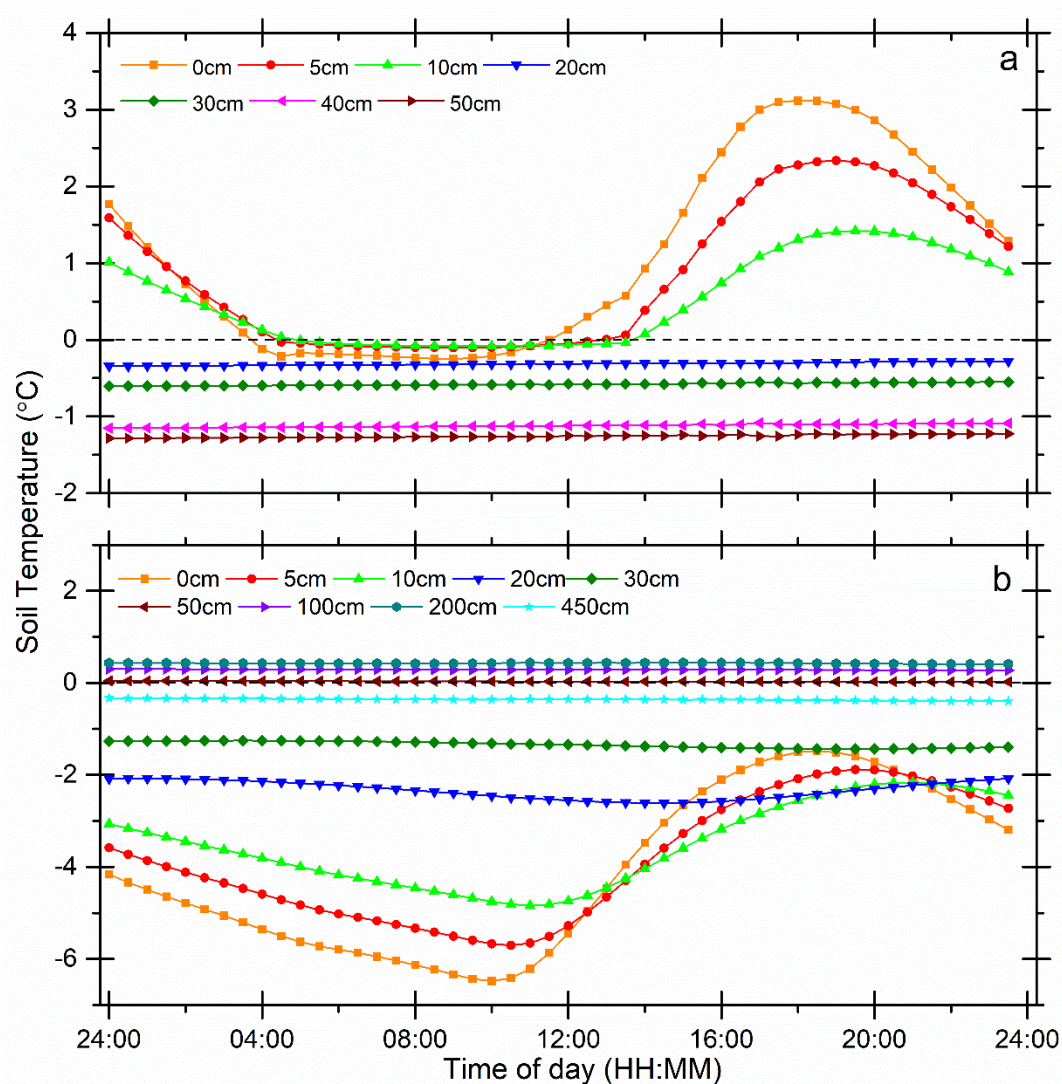

**Supplementary Figure 10.** Average half-hour scale of 0 – 450 cm soil temperature ( $T_{\text{soil}}$ ) diel variations from 2012 to 2016, (a) is for spring\_, (b) is for autumn\_. Notedly, during spring, the  $T_{\text{soil}}$  of 100cm, 200cm, 450cm were all below  $-2^{\circ}\text{C}$  and during autumn\_ the  $T_{\text{soil}}$  of 40cm almost overlap to  $T_{\text{soil}}$  of 50cm, to make the figure more clearly, we removed the  $T_{\text{soil}}$  of 100cm, 200cm, 450cm in figure (a) and removed the  $T_{\text{soil}}$  of 40cm for figure (b).

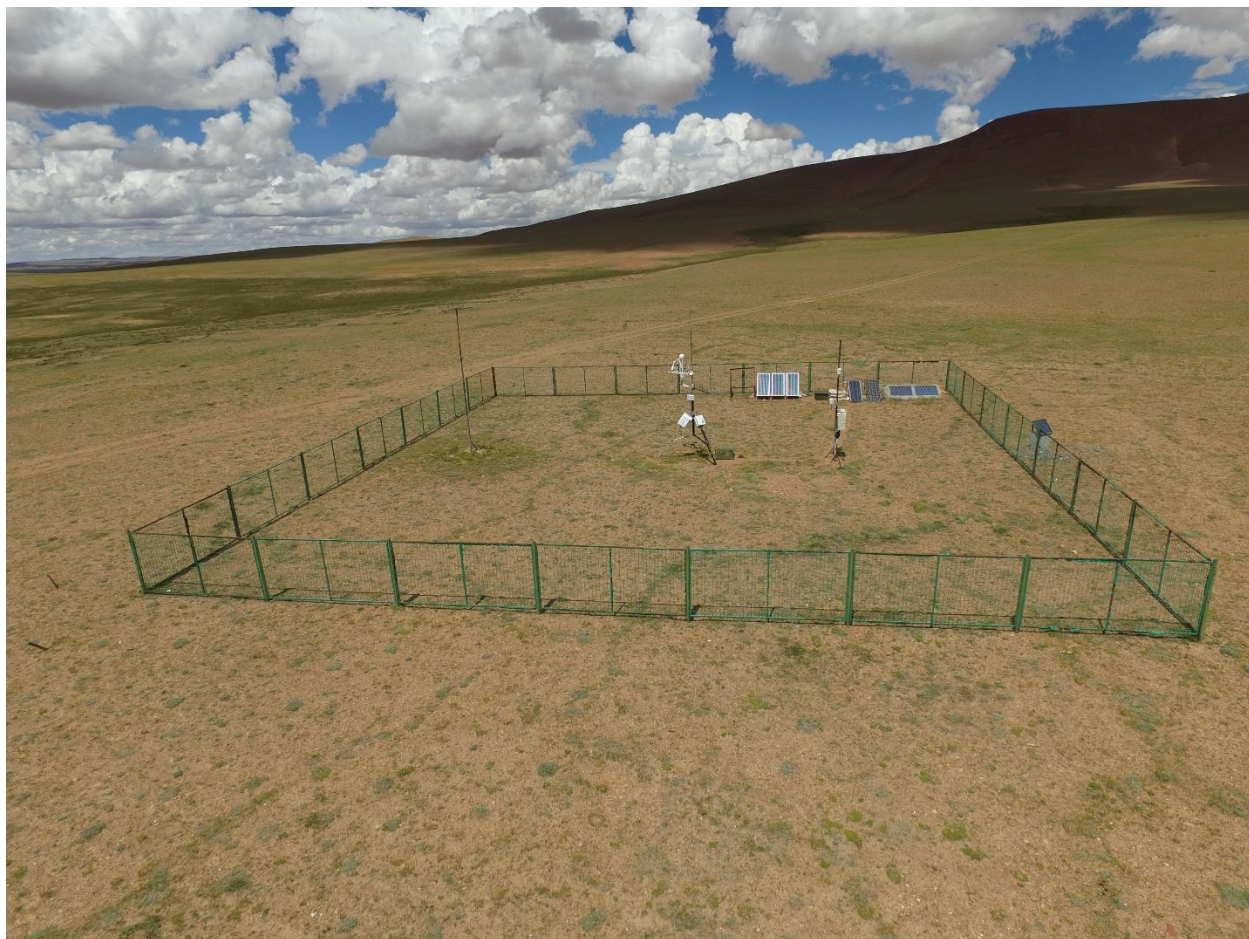

969

970

**Supplementary Figure 11.** A bird's eye view of the eddy covariance in Beilu'he station
